# Supplementary material for: Ectomycorrhizal fungal communities associated with Larix gemelinii Rupr. in the Great Khingan Mountains, China
Source: PeerJ. 2021 Apr 15;9:e11230. doi: 10.7717/peerj.11230 (PMC8053382; doi:10.7717/peerj.11230)
Supplement: Supplemental Information 11 [file peerj-09-11230-s011.xlsx]

## Sheet: Sheet1
Supplemental Table S2 Molecular identification of ectomycorrhizal (EM) fungi in this study.
OTU_ID	Rep.Seqs No.	ENA accession No.	Sequence	kindom	phylum	class	order	family	genus	EM lineage	ref.UNITE+INSDC match	Coverage	E-value	Identity (%)	Abundance	Relative abundance	Frequency
OTU_1	K1_1845508|F|ITS2	LR824644	AATTCTCAACTGCCTTTTAGCATTTATGCTAAGGTGAAGTTGGAGTTGGAGGATAATTGCTGGCGCAGCTTAGGTTGCTTGTTGGCTCCTCTTGAATGGATGAGCTTTTCTGATAGATTATGGCTCAGTAACACTAATGTGATAATTATCTACGTTAGATGTGAAAGCTGTGAGTAGAGTGACTTCAATTATGGAGAAGCTCCTACAGAAAAGGTATGTCTTGGGGAACAAGACTTGAAATATAATGACAA	Fungi	Basidiomycota	Agaricomycetes	Thelephorales	Thelephoraceae	Pseudotomentella	/pseudotomentella	UDB007434|k__Fungi;p__Basidiomycota;c__Agaricomycetes;o__Thelephorales;f__Thelephoraceae;g__Pseudotomentella;s__Pseudotomentella_sp|SH1185304.08FU	100	1e-120	98.01	160	0.734012	2
OTU_2	K1_1845555|F|ITS2	LR824645	AATTCTCAACCCCGATTGATTTGTTTCTATTCGGGTCTTGGACTTGGAGTGTGCTGGCGAAGGTCGGCTCCTCTCAAATGCATCAGCGGAATTCAACCTTTGGCTTCCAGACATCAGTGTGATAATGACGTTGCACTGTTGTCTGACCCTCAAAGTCCGCTTACAATGGTCTTCGGACAAACCTTTCATCAG	Fungi	Basidiomycota	Agaricomycetes	Atheliales	Atheliaceae	Piloderma	/piloderma	KM374356|k__Fungi;p__Basidiomycota;c__Agaricomycetes;o__Atheliales;f__Atheliaceae;g__Piloderma;s__Piloderma_sp|SH1544843.08FU	99	3e-80	94.82	9	0.0412882	3
OTU_3	K1_1848871|F|ITS2	LR824646	AATTCTCAACCCCGAATCGATTTGTTTCTATTCGGGGCTTGGACTTGGAGCGTGCTGGCGAAGGTCGGCTCCTCTCAAATGCATCAGCGGAATTCAACCTTTGGATTCCGGACATCAGTGTGATAATGACGTTGCACTGTTGTCTGACCCTCAAAGTCCGCTTACAATGGTCTTCGGACAAACCTTTCATCAG	Fungi	Basidiomycota	Agaricomycetes	Atheliales	Atheliaceae	Piloderma	/piloderma	KM374356|k__Fungi;p__Basidiomycota;c__Agaricomycetes;o__Atheliales;f__Atheliaceae;g__Piloderma;s__Piloderma_sp|SH1544843.08FU	99	6e-87	96.89	1	0.00458758	1
OTU_4	K1_1861805|F|ITS2	LR824647	ACACCTCAACTCTCATGGTCCGCCATGATGAGCTTGGACTTTGGGGGCCTTGCCGGCCTAGCGTCGGCTCCTCTCAAATAGATCAGCTTGCCAGTGTTTGGTGGCGTCACAGGTGTGATAACTATCTACGCATGTGGTTCTCCGCCATGTAACCTTCAGTGATGGAGGTTCGCTGGAGCTCACAGATGTCTCTCCTTGGGAGGACAGCTTTTGAAC	Fungi	Basidiomycota	Agaricomycetes	Thelephorales	Thelephoraceae	Tomentella	/tomentella-thelephora	UDB026656|k__Fungi;p__Basidiomycota;c__Agaricomycetes;o__Thelephorales;f__Thelephoraceae;g__Tomentella;s__Tomentella_sp|SH1503132.08FU	100	3e-100	97.22	1	0.00458758	1
OTU_5	K1_1861968|F|ITS2	LR824648	AATTCTCAACCCCTCTCGATTTGCTTCGATAGGGTGCTTGGATACTGGGGGCTGCCGGAGACCTGGACTCTCGTCTAGGACTCGGGCTCTCCTGAAATGAATCGGCTTGCGGTCGACTTTCGACTTTGCATGACAAGGCTTTTGGCGTGATAATGATCGCCGTTCGCTGAAGTGCATGAATGAATGGTCCCGTGCCTCTAATGCGTCGACGCCTTTTTGGCGTCTTCCTTATTGAC	Fungi	Basidiomycota	Agaricomycetes	Boletales	Suillaceae	Suillus	/suillus-rhizopogon	KU721449|k__Fungi;p__Basidiomycota;c__Agaricomycetes;o__Boletales;f__Suillaceae;g__Suillus;s__Suillus_viscidus|SH1630048.08FU	100	3e-121	100	9	0.0412882	1
OTU_6	K100_1081|F|ITS2	LR824649	AAACCTCAACTCTCACGGTTCGCCGTGATGAGCTTGGACTTTGGGGTCTTGCCGGCCCTGCGGTCGGCTCCTCTCAAACGGATCAGCTTGCCAGTGTTTGGTGGCGTCACGGGTGTGATAACTATCTACGCTTGTGGTTTTTCACCAGGTAACCTTCAGCGATGGGGGTTCGCTGGGGCTCATAAACGTCCCTCGAGGACAGCCTTTGAAC	Fungi	Basidiomycota	Agaricomycetes	Thelephorales	Thelephoraceae	Tomentella	/tomentella-thelephora	KT275668|k__Fungi;p__Basidiomycota;c__Agaricomycetes;o__Thelephorales;f__Thelephoraceae;g__Tomentella;s__Tomentella_sp|SH1502445.08FU	91	9e-76	93.33	287	1.31663	5
OTU_7	K100_11008|F|ITS2	LR824650	ACACCTCAACTCTTGTGGTTCGCCATGAAGAGCTTGGACTTGGGGGCTTGCTGGCGCACAGCCAGCTCCTCTCAAATGAATTAGCCTGCCAGTGTTTGGTGGCGTCACGGGTGTGATAACTATTTACGCTTGTGGTTGCCTGCCGGGTAACCTTCGGTGACGGAGGTTTGCTGGAGCTTATAAATGTCTTTCCTTGGTGAAGACAGCTTTTGAAC	Fungi	Basidiomycota	Agaricomycetes	Thelephorales	Thelephoraceae	Tomentella	/tomentella-thelephora	AB848636|k__Fungi;p__Basidiomycota;c__Agaricomycetes;o__Thelephorales;f__Thelephoraceae;g__Tomentella;s__Tomentella_sp|SH1502202.08FU	100	3e-101	97.69	317	1.45426	1
OTU_8	K100_11580|F|ITS2	LR824651	ACACCTCAACTCTCATGGTCCGCCATGACGAGCTTGGACTTTGGGGGTCTTGCCGGCCTAGCGTCGGCTCCTCTCAAATGGATCAGCTTCCCAGTGTTTGGCGGCGTCACAGGTGTGATAACTATCTACGCTTGTGGTTCTCTGCCATTAACCTTCAGCGATGGAGGTTCGCTGGAGCTCACAGATGTCTCTCCTTGAGGAGGACAGCTTTTTGAAC	Fungi	Basidiomycota	Agaricomycetes	Thelephorales	Thelephoraceae	Tomentella	/tomentella-thelephora	KC966112|k__Fungi;p__Basidiomycota;c__Agaricomycetes;o__Thelephorales;f__Thelephoraceae;g__Tomentella;s__Tomentella_sp|SH1502237.08FU	99	6e-98	96.76	3	0.0137627	2
OTU_9	K100_118|F|ITS2	LR824652	AAAACCGACTCACATATCATGTGGTATTGGTAGAAGTGGATAGTACTAACACTACTTTGTCTTACTCTGCTGAAATGAATAGGCCAGAAAAGTGGACCATGGTAATAGATTCCAGGAGTGTTTTAAAATGCTATACTAGTCTTATCCAAGTCATATTCTGAGCCACTGGACCCCCCATTTAGTCCAAACAACAGT	Fungi	Ascomycota	Pezizomycetes	Pezizales	Tuberaceae	Tuber	/tuber-helvella	KT182910|k__Fungi;p__Ascomycota;c__Pezizomycetes;o__Pezizales;f__Tuberaceae;g__Tuber;s__Tuber_sp|SH1561429.08FU	100	1e-98	100	106	0.486283	4
OTU_10	K100_11921|F|ITS2	LR824653	ACACCTCAACTCTCGTGGTTTGCTACGATGAGCTTGGACTTTGGGGGTCTTGCTGGCCTGTGGTCGGCTCCTCTCAAATGAATCAGCTTCCCAGTGTTTGGTGGCGTCGCAGGTGTGATAACTATCTACGCTTGTGGTTTTCCACCAGATAACCTTCAGTGATGGAGGTTCGCTGGGGCTCATAAACGTCTTTCCTCAGTGAAGACAGCTTTTTGAAC	Fungi	Basidiomycota	Agaricomycetes	Thelephorales	Thelephoraceae	_	/tomentella-thelephora	EF218826|k__Fungi;p__Basidiomycota;c__Agaricomycetes;o__Thelephorales;f__Thelephoraceae;g__unidentified;s__Thelephoraceae_sp|SH1502204.08FU	100	3e-111	100	4	0.0183503	1
OTU_11	K100_123|F|ITS2	LR824654	AATTCTCAACCCCGAATCGATTTGTTTCTATTCGGGGCTTGGACTTGGAGCGTGCTGGCGAAGGTCGGCTCCTCTCAAATGCATCAGCGGAATTCAACCTTTGGATTCCGGACATCAGTGTGATAATGACGTTGCGCTGTCGTCCGACCCTCAAAGTCCGCTTACAATGGTCTTCGGACAAAACCTTGCATCAT	Fungi	Basidiomycota	Agaricomycetes	Atheliales	Atheliaceae	Piloderma	/piloderma	KM374356|k__Fungi;p__Basidiomycota;c__Agaricomycetes;o__Atheliales;f__Atheliaceae;g__Piloderma;s__Piloderma_sp|SH1544843.08FU	100	2e-96	99.48	2347	10.767	8
OTU_12	K100_1278|F|ITS2	LR824655	AATCCTCAACCCCACCGATTTGTTTCGGGGGGATTGGACTTGGAGTGTGCTGGCGAAGGTCGGCTCCTCTTTAAATGCATCAGTGGAGAAGAAACTCGCCCCAGTGTGATAATCCTGTTGCGCTGTGGTGGGGTGAAAGTCCGCTTCCAACTGTCCTCCGGGACAAGACATCATCTCA	Fungi	Basidiomycota	Agaricomycetes	Atheliales	Atheliaceae	Amphinema	/amphinema-tylospora	UDB020319|k__Fungi;p__Basidiomycota;c__Agaricomycetes;o__Atheliales;f__Atheliaceae;g__Amphinema;s__Amphinema_sp|SH1648320.08FU	100	2e-87	99.44	8	0.0367006	2
OTU_13	K100_13429|F|ITS2	LR824656	ACACCTCAACTCTTGTGGTTCGCCATGAAGAGCTTGGACTTGGGGGCTTGCTGGTGCACAGCCGGCTCCTCTCAAATGAATTAGCCTGCCAGTGTTTGGTGGCGTCACGGGTGTGATAACTATTTACGCTTGTGGTTGCCTGCCAGGTAACCTTCGGTGACGGAGGTTCGCTGGAGCTTATAAACGTCCCTCGAGGACAGCCTTTGAAC	Fungi	Basidiomycota	Agaricomycetes	Thelephorales	Thelephoraceae	_	/tomentella-thelephora	LC175682|k__Fungi;p__Basidiomycota;c__Agaricomycetes;o__Thelephorales;f__Thelephoraceae;g__unidentified;s__Thelephoraceae_sp|SH1502202.08FU	90	5e-93	99.47	2	0.00917515	1
OTU_14	K100_13560|F|ITS2	LR824657	AAACTCTCAAACCACATCATTCGTTTGACGTGGCTTTGGACGTGGGGGTTGCCGGCTTTCTTCTCAGAGAGGCCTGCTCCTCTGAAATGCATTAGTGGTATCTGAAGTGGAAAAACCGCTAGGTGTGATAATACTGTCTATGCCTTTGGTTTATGCCGCATGTGCTGCTTCCAACCGCACATTTTTGACAA	Fungi	Basidiomycota	Agaricomycetes	Agaricales	Inocybaceae	Inocybe	/inocybe	KJ173911|k__Fungi;p__Basidiomycota;c__Agaricomycetes;o__Agaricales;f__Inocybaceae;g__Inocybe;s__Inocybe_sp|SH1547269.08FU	100	2e-96	100	1	0.00458758	1
OTU_15	K100_1385|F|ITS2	LR824658	AATTCTCAAACTCTGATTGATTTTGTTTTTGATCAGAGCTTTGGATTTGGAGCGTGCTGGCGTCAGTCGGCTCCTCTTGAATGCATCAGCGGAATCCCCATTCATTTCGGACGTCAGTGTGATAATCATGTTGCGCTGTCTCTTGCCGATCTTGAAAGCCCGCTCACAATGGTCTTCGGACAAACCTCACATATCAA	Fungi	Basidiomycota	Agaricomycetes	Atheliales	Atheliaceae	Piloderma	/piloderma	KM576315|k__Fungi;p__Basidiomycota;c__Agaricomycetes;o__Atheliales;f__Atheliaceae;g__Piloderma;s__Piloderma_sp|SH1544819.08FU	100	1e-99	100	170	0.779888	2
OTU_16	K100_14|F|ITS2	LR824659	AATTCTCAACCTTTTCAGCTTTTTCTGTTGATCAGGCTTGGATGTGGGAGTATGCGGGCTTCTCAGAAGTCGGCTCTCCTGAAATGCATTAGCGGGACCTTTGTTGCCTTGCTTTGGTGTGATAATTATCTACGCCATTTGTGAAGAGCAGCTTTATAAATGGGGTTCAGCTTCTAAAGGGTCTCTTTTGAGACAGCTTCTGACA	Fungi	Basidiomycota	Agaricomycetes	Agaricales	Tricholomataceae	Tricholoma	/tricholoma	MF034240|k__Fungi;p__Basidiomycota;c__Agaricomycetes;o__Agaricales;f__Tricholomataceae;g__Tricholoma;s__Tricholoma_bonii|SH1647746.08FU	100	4e-104	100	7864	36.0767	19
OTU_17	K100_14053|F|ITS2	LR824660	AATTCTCAACTGCCTTTTAGCATTTATGTTAAGGGTGAAGTTGGAGTTGGAGGATAATTGCTGGCGCAACTGAGGTTGCTTGTTGGCTCCTCTTGAATGAATGAGTTTTTCTGATGGATCATAGCTCAGTAACACTAATGTGATAATTATCTACGTTAGATGTGAAGAGGCTCCTACAGAAAAGGTGTATCTTGGGGATAACAAACCCTTGACTTTGACAA	Fungi	Basidiomycota	Agaricomycetes	Thelephorales	Thelephoraceae	Pseudotomentella	/pseudotomentella	MK290700|k__Fungi;p__Basidiomycota;c__Agaricomycetes;o__Thelephorales;f__Thelephoraceae;g__Pseudotomentella;s__Pseudotomentella_umbrina|SH1564287.08FU	100	6e-113	100	25	0.114689	4
OTU_18	K100_15|F|ITS2	LR824661	GTACTCTCACACTTCTGATCTTTTGGGTCGGGAGCGGTGGACTTGGGTGTTGCTGCTTTACTGTGGCTCACCTCAAATGCATTAGTGCAACTCTTGGTTGGACATAGTACGGCGTGATAAGTATCTTCGCCGGCACCTCGCAAGAGGGTGGCTGATCAGGAGCTCTGTGCTTTCCAACTGTCTTCAGACAACAACTGACA	Fungi	Basidiomycota	Agaricomycetes	Sebacinales	Sebacinaceae	Sebacina	/sebacina	KC986244|k__Fungi;p__Basidiomycota;c__Agaricomycetes;o__Sebacinales;f__Sebacinaceae;g__Sebacina;s__Sebacina_sp|SH1561861.08FU	100	2e-101	100	39	0.178915	5
OTU_19	K100_1505|F|ITS2	LR824662	ACACCTCAACTCTCGTGGCTTGCCATGATGAGCTTGGACTTTGGGGGTCTTGTTGGCCTGTGTGCCAGCTCCTCTTAAATGAATTAGCTTGCCGGTGTTTGGTGGCACCATGGGTGTGATAAATATCTACGCTTGTGGTTTCCCACCAGCTAACCTTCAGTGATGGAGGTTCACTGGAGCTTATAAATGTCTCTCCTTGGAGAGGACACATTTTGACC	Fungi	Basidiomycota	Agaricomycetes	Thelephorales	Thelephoraceae	_	/tomentella-thelephora	UDB026591|k__Fungi;p__Basidiomycota;c__Agaricomycetes;o__Thelephorales;f__Thelephoraceae;g__unidentified;s__Thelephoraceae_sp|SH1610975.08FU	100	3e-106	98.62	28	0.128452	6
OTU_20	K100_15789|F|ITS2	LR824663	AATTCTCAAACCTCTCAAATTTAGAGGAGAGAGGGTTTGGACTTGGAGTGTGCTGGGTCATGTCAGCTCCTCTTAAATGCATTAGCTTGTACTCTTGTGGATGGGCTTTGGTTTGATAATATCTATGCCATTGCTGTGAAACAAATATCAGCTTCTAACACCCCATACTTTATTATAT	Fungi	Basidiomycota	Agaricomycetes	Agaricales	Hygrophoraceae	Hygrophorus	/hygrophorus	JF908069|k__Fungi;p__Basidiomycota;c__Agaricomycetes;o__Agaricales;f__Hygrophoraceae;g__Hygrophorus;s__Hygrophorus_queletii|SH1239058.08FU	100	3e-89	100	8	0.0367006	3
OTU_21	K100_1598|F|ITS2	LR824664	AATCATCAACCCCACCGATTTGTTTCGGCTTGGGGCTTGGACTTGGAGCGTGCTGGCGAAGGTCGGCTCCTCTTTAAATGCATCAGCGGAAGAACGCATCTTTTTTCCCTTCAGCGTGATAATCCTGTTGCGCTGTGTGTGGGTCAAAGGTGTTCCGCTTATAATCGTCCTTCGGACAAACGAACCCATCTAT	Fungi	Basidiomycota	Agaricomycetes	Atheliales	Atheliaceae	Amphinema	/amphinema-tylospora	AB669637|k__Fungi;p__Basidiomycota;c__Agaricomycetes;o__Atheliales;f__Atheliaceae;g__Amphinema;s__Amphinema_sp|SH1648326.08FU	100	2e-97	100	3	0.0137627	2
OTU_22	K100_16242|F|ITS2	LR824665	AATCCTCAAAAACCCTTTTCCTGTCAGGAATGGGATTTTTGGACTTGGAGGTTCAATGCTTGCCTTTCACTTTTGAAAGTGAGCTCCTCTCAAATGAATTAGTGGGGTCCGCTTTGCTGATCCTTAACGTGATAAGATGCTTCTACGTTTTGGATCTAGCACTGTCCCTTGGATGCCTGCTCCTAACTGTCCCACACGGACAATGATGGTGCTCTGGTCACCGCCATCTACATTGGCGGGAGGCTGGACCCACAAAACGAAAA	Fungi	Basidiomycota	Agaricomycetes	Russulales	Russulaceae	Russula	/russula-lactarius	UDB036935|k__Fungi;p__Basidiomycota;c__Agaricomycetes;o__Russulales;f__Russulaceae;g__Russula;s__Russula_paludosa|SH1538841.08FU	100	3e-136	100	265	1.21571	1
OTU_23	K100_182|F|ITS2	LR824666	GTACTCTCACACTTCCGATCTTGCATTGGGAGCGGTGGACTTGGGTTTGCTGCTTTACCGTAGCTTACCTCAAATGGGTTAGTGCAGCTCTTGGTTGGACATAGTACGGCGTGATAAGTATCTTCGCTGGTGCCTCGCAAGAGGGTGGCCGATCGGGATGTTGTGCTCCAAACCGTCTTCGGACAATCTCTGACA	Fungi	Basidiomycota	Agaricomycetes	Sebacinales	Sebacinaceae	Sebacina	/sebacina	KX510022|k__Fungi;p__Basidiomycota;c__Agaricomycetes;o__Sebacinales;f__Sebacinaceae;g__Sebacina;s__Sebacina_sp|SH1215592.08FU	98	6e-97	100	11	0.0504633	3
OTU_24	K100_2066|F|ITS2	LR824667	ACACCTCAACTCTCATGGCTTGCCATGATGAGCTTGGACGATGGGGGTCTTGCTGGCCTGTGGTCAGCTCCTCTCAAATAAATCAGCTTGCCAGTGTTTGGTGGCGTCACAGGTGTGATAACTATCTACGCTTGTGGTTTTCCACTAGGTAACCTTTGGCAACAGAGGTTCGCTGGGGCTTATAAAGGTCTCTCCTCGGTGAGGGACAGCTCTTTGAAC	Fungi	Basidiomycota	Agaricomycetes	Thelephorales	Thelephoraceae	Tomentella	/tomentella-thelephora	KX444269|k__Fungi;p__Basidiomycota;c__Agaricomycetes;o__Thelephorales;f__Thelephoraceae;g__Tomentella;s__Tomentella_sp|SH1502475.08FU	100	3e-110	99.54	5	0.0229379	3
OTU_25	K100_214|F|ITS2	LR824668	AATTCTCAAAAGCCCTTCCTTTGGTGGAGAGGATTTTGGACTTGGAGGTCATTTGCTGGTTTCACCTTGAAGCGAGCTCCTCCCAAATGGATTAGTGGGGTCTGCTTTGCCGATCCTTGACGTGATAATATGTTTCTACGTCTCGGGTTTCTGCACTGTACCTCTGCTTCTAACCGTCTCATTGACAACGATGGTGTTCCGGTCACCGCCGATTCATCGGTGGGAGGCTCGACCCACAAAAACGA	Fungi	Basidiomycota	Agaricomycetes	Russulales	Russulaceae	Russula	/russula-lactarius	UDB034306|k__Fungi;p__Basidiomycota;c__Agaricomycetes;o__Russulales;f__Russulaceae;g__Russula;s__Russula_sp|SH1509018.08FU	100	3e-126	100	597	2.73878	3
OTU_26	K100_2233|F|ITS2	LR824669	ACACCTCAACTCTTGTGGTTCGCCATGAAGAGCTTGGACTTGGGGGCTTGCTGGCGCACAGCCGGCTCCTCTCAAATGAATTAGCCTGCCAGTGTTTGGTGGCGTCACGGGTGTGATAACTATTTACGCTTGTGGTTGCCTGCCAGGTAACCTTCGGTGACGGAGGTTCGCTGGAGCTTATAAACGTCTTTCCTTGGTGAAGACAGCTTTTTGAAC	Fungi	Basidiomycota	Agaricomycetes	Thelephorales	Thelephoraceae	Tomentella	/tomentella-thelephora	AB848636|k__Fungi;p__Basidiomycota;c__Agaricomycetes;o__Thelephorales;f__Thelephoraceae;g__Tomentella;s__Tomentella_sp|SH1502202.08FU	100	3e-110	100	1195	5.48215	6
OTU_27	K100_2441|F|ITS2	LR824670	ATATATCAACCTTCTTTGGTTGGATGTGGGTTTGCTGGCCTCCCCGAGGTCAGCTCCCCTTAAATGCATTAGCGGACAACATTTTGCCAACTGTTCATTGGTGTGATAATTATCTACGCTATTGACGTGAAGCAATGTTCAGCTTCTAACAGTCCATTGACTTGGACAAATTTACTTTTATTA	Fungi	Basidiomycota	Agaricomycetes	Agaricales	Cortinariaceae	Cortinarius	/cortinarius	MK512081|k__Fungi;p__Basidiomycota;c__Agaricomycetes;o__Agaricales;f__Cortinariaceae;g__Cortinarius;s__Cortinarius_sp|SH1141752.08FU	100	6e-92	100	5	0.0229379	2
OTU_28	K100_2865|F|ITS2	LR824671	ACACCTCAACTCTCGTGGTCCGCCATGATGAGCTTGGACTTTGGGGGTCTTGCTGGCCTAGTGTCGGCTCCTCTCAAATGGATCAGCTTGCCAGTGTTTGGTGGCGTCGCAGGTGTGATAACTATCTACGCTTGTGGTTCTCTGCCATGTAACCTTCAGTGATGGAGGTTCGCTGGAGCTCACAGATGTCTCTCCTGGGAGGACAGCTCTTTGAAC	Fungi	Basidiomycota	Agaricomycetes	Thelephorales	Thelephoraceae	_	/tomentella-thelephora	JX630842|k__Fungi;p__Basidiomycota;c__Agaricomycetes;o__Thelephorales;f__Thelephoraceae;g__unidentified;s__Thelephoraceae_sp|SH1502214.08FU	100	3e-105	98.61	3	0.0137627	2
OTU_29	K100_3034|F|ITS2	LR824672	AATTCTCAACTATTATCAGCTTTTGTTGATAATGGCTTGGATATGGGGGTTTATTTTGCTGGCTTCTTCACAGATTGTCAGCTCCCCTTAAATGCATTAGCTGGTGCCCCGCGTGGACTGTCTATTGGTGTGATAATTATCTACGCCGTGGACATCTACAATCATATGGGTTTGCACTGCTTCCAACCGTCTGTTTATTCAGACAATACATGACA	Fungi	Basidiomycota	Agaricomycetes	Agaricales	Hymenogastraceae	Hebeloma	/hebeloma-alnicola	KY081721|k__Fungi;p__Basidiomycota;c__Agaricomycetes;o__Agaricales;f__Hymenogastraceae;g__Hebeloma;s__Hebeloma_dunense|SH1563787.08FU	100	5e-108	99.53	64	0.293605	2
OTU_30	K100_327|F|ITS2	LR824673	AAATCATATCAAGCAATTTTGCATGGTCATGGAGGAAGAGTCCACCCGGTGTGGTCTCCCCGCCGAAATGCAACGGCGGAAAGTCTCTGATACTAGGCGTAGTAGTAACGTTCGCTTTGTATCCGCAGTCATTCCTGCCAGCGAAACCCCCACAATTCTCTT	Fungi	Ascomycota	Pezizomycetes	Pezizales	Pyronemataceae	Geopora	/geopora	JN558642|k__Fungi;p__Ascomycota;c__Pezizomycetes;o__Pezizales;f__Pyronemataceae;g__Geopora;s__Geopora_sp|SH1573079.08FU	100	2e-80	100	2	0.00917515	2
OTU_31	K100_330|F|ITS2	LR824674	GTACTCTCACACTTCCAATTCTTTGGATTGGGAGCGGTGGACTTGGGCGCTGCTGCTTTACTGTGGCTCACCTCAAATGCATTAGTGCAACCCTTGGTTAGACATAGTACGGCGTGATAAGTGTCTTCGCTGGCGCCTCACTTTTAGAGGGTGGCTGATCAGGGGCTCTGTGCTTCAAACCGTCTTTGGACAATGGCTGACA	Fungi	Basidiomycota	Agaricomycetes	Sebacinales	Sebacinaceae	Sebacina	/sebacina	KC965251|k__Fungi;p__Basidiomycota;c__Agaricomycetes;o__Sebacinales;f__Sebacinaceae;g__Sebacina;s__Sebacina_sp|SH1561858.08FU	100	1e-98	99.01	7	0.032113	3
OTU_32	K100_3421|F|ITS2	LR824675	ACACCTCAACTCTCATGGTCCGCCATGATGAGCTTGGACTTTGGGGGCCTTGCCGGCCTACTGCCGGCTCCTCTCAAATGAATCAGCTTGCCAGTGTTTGGTGGCATCACAGGTGTGATAACTATCTACGCTTGTGGTCTGCCGCCAGGTAACCTCCAGTGATGGAGGTTCGCTGGAGCTCACAAATGTCTCTCCTCAGCGAGGACAGCTTCTTGAAC	Fungi	Basidiomycota	Agaricomycetes	Thelephorales	Thelephoraceae	Tomentella	/tomentella-thelephora	KC966038|k__Fungi;p__Basidiomycota;c__Agaricomycetes;o__Thelephorales;f__Thelephoraceae;g__Tomentella;s__Tomentella_sp|SH1140668.08FU	100	6e-108	99.08	1	0.00458758	1
OTU_33	K100_3499|F|ITS2	LR824676	GTACTCTCACACTTCCGATCTTGCATTGGGAGCGGTGGACTTGGGTTTGCTGCCTTACCGTAGCTTACCTCAAATGTGTTAGTGCAACTCTTGGTTGGACATAGTACGGCGTGATAAGTATCTTCGCCGGTGCCTCGCAATTGCGAGGGTGGCCGATCGGGATGTTGTGCTCCAAACCGTCTTCGGACAATCTCTGACA	Fungi	Basidiomycota	Agaricomycetes	Sebacinales	Sebacinaceae	Sebacina	/sebacina	KU924633|k__Fungi;p__Basidiomycota;c__Agaricomycetes;o__Sebacinales;f__Sebacinaceae;g__Sebacina;s__Sebacina_sp|SH1615388.08FU	100	8e-101	100	626	2.87182	3
OTU_34	K100_3830|F|ITS2	LR824677	AATTCTCAACTCCGATCGATTTGTTTCGACCTCGGAGCTTGGACTTTGGAGTGTGCTGGCGTCGGTCGGCTCCTCTCAAATGCATCAGCGGAATCTAACGTTTCGGACGTCAGTGTGATAATCACGTTGCGCTGTCAACCGATCCTGAAAGGCCCGCTCATAATGGTCTTCGGACAACTTCATATCAA	Fungi	Basidiomycota	Agaricomycetes	Atheliales	Atheliaceae	Piloderma	/piloderma	MH809947|k__Fungi;p__Basidiomycota;c__Agaricomycetes;o__Atheliales;f__Atheliaceae;g__Piloderma;s__Piloderma_bicolor|SH1544805.08FU	100	1e-94	100	1	0.00458758	1
OTU_35	K100_4029|F|ITS2	LR824678	AGACGATTTTCAAGCTCTTTTTGCTTGGTTCTGACGGTTGAGTGTTGCCCTTGTACTCATTCACCTTTGAAATTTACTGGCGGACTGCTTCGTGTTCCTTTTAGCGTTATAGGATAACTCTTTCGCTTGGACTCGGTGGCTCGTCCTGCCCCAAAACCCCCAACTATTTTGA	Fungi	Ascomycota	Pezizomycetes	Pezizales	Pyronemataceae	Otidea	/otidea	KM010095|k__Fungi;p__Ascomycota;c__Pezizomycetes;o__Pezizales;f__Pyronemataceae;g__Otidea;s__Otidea_mirabilis|SH1614359.08FU	100	3e-74	95.95	1	0.00458758	1
OTU_36	K100_4167|F|ITS2	LR824679	ATGTCTCAACCACTCCGTGAGGTGTGGCTTGGATTTGGGGGTTACAGGCCTAGTCTGCTCCCCTGAAATACATGAGTGGTAGCGACCTCTCCATTAAGATGTGATACATATCTGCATCTGGTCGAGGGTTCTGCTGCTATATAAGAGTTGGATTTGATAA	Fungi	Basidiomycota	Agaricomycetes	Agaricales	Inocybaceae	Inocybe	/inocybe	MN388804|k__Fungi;p__Basidiomycota;c__Agaricomycetes;o__Agaricales;f__Inocybaceae;g__Inocybe;s__Inocybe_sp|SH1553917.08FU	100	7e-76	98.75	58	0.266079	3
OTU_37	K100_4415|F|ITS2	LR824680	ACACCTCAACTCTTTATGGTCTTCCATGATGAGCTTGGACTTTGGGGGGTTTTGCTGGCCTACAGTCAGCTCCTCTAAAATGAATCAGCTTGCCGGTGTTTGGTGGGTATCATGGGTGTGATAACTATCTACGCTCGTGGTTTTCCACCAGGTGTAACCTTCAGCAGTGGAGGTTCACTGGAAGCTCATAGATGTCTCTCCTCAGTGAGGACAGCCCTTTGAAT	Fungi	Basidiomycota	Agaricomycetes	Thelephorales	Thelephoraceae	Tomentella	/tomentella-thelephora	UDB034319|k__Fungi;p__Basidiomycota;c__Agaricomycetes;o__Thelephorales;f__Thelephoraceae;g__Tomentella;s__Tomentella_sp|SH1528462.08FU	100	4e-104	97.32	2	0.00917515	2
OTU_38	K100_49|F|ITS2	LR824681	ATGTCTCAACCACACCATGAGGTGTGGCTTGGATTTGGGGGTTACAGGCCTAGTCTGCTCCCCTGAAATGCATGAGTGGTAACGACCTCTCCATTAAGATGTGATACATATCTGCATCTGGTCGAGGGTTCTGCCGCTATATAAGAGTTGGATTTGATAA	Fungi	Basidiomycota	Agaricomycetes	Agaricales	Inocybaceae	Inocybe	/inocybe	KP783442|k__Fungi;p__Basidiomycota;c__Agaricomycetes;o__Agaricales;f__Inocybaceae;g__Inocybe;s__Inocybe_maculata|SH1553917.08FU	100	1e-77	99.38	68	0.311955	3
OTU_39	K100_5|F|ITS2	LR824682	AAACCTCAACTCTCACGGTTCGCCGTGATGAGCTTGGACTTTGGGGGTCTTGCCGGCCTACGGTCGGCTCCTCTCAAACGGATCAGCTTGCCAGTGTTTGGTGGCGTCACGGGTGTGATAACTATCTACGCTTGTGGTTTTTCACCAGGTAACCTTCAGCGATGGGGGTTCGCTGGGGCTCATAAACGTCCCTCGAGGACAGCCTTTGAAC	Fungi	Basidiomycota	Agaricomycetes	Thelephorales	Thelephoraceae	Tomentella	/tomentella-thelephora	UDB034392|k__Fungi;p__Basidiomycota;c__Agaricomycetes;o__Thelephorales;f__Thelephoraceae;g__Tomentella;s__Tomentella_sp|SH1502330.08FU	91	2e-78	94.27	368	1.68823	4
OTU_40	K100_7291|F|ITS2	LR824683	AATACCTCTCAAGCACCATTGCTTGGTCATGGAAGATGAGTATGCTTGCATTCTCCCTTCTGAAATTCAAAGGCGGATCATCTCATATTCCCTGGCGTAGTAAGTGTTTATCTTTCGCTTGGAGTGTGTGACAGTCTTGCCATCGACCCCCATTATTTCAA	Fungi	Ascomycota	Pezizomycetes	Pezizales	Pyronemataceae	Wilcoxina	/wilcoxina	KU245940|k__Fungi;p__Ascomycota;c__Pezizomycetes;o__Pezizales;f__Pyronemataceae;g__Wilcoxina;s__Wilcoxina_mikolae|SH1557657.08FU	100	9e-80	100	104	0.477108	6
OTU_41	K100_7401|F|ITS2	LR824684	AATTCTCAACCCCTCTCGATTTGCTTCGAAAGGGTGCTTGGATAGTGGGGGCTGCCGGAGATCTGGACTTCTCGTCTAGGACTCGGGCTCCCCTGAAATGAATGGGCTTGCGGTCGACTTTCGACTATGCATGACAAGGCTTTTGGCGTGATAATGATCGCCGCTCGCCGAAGTGCATGAATGAACGGTCCCGTGCCTCTAATGCGTCGATGCCTTCTGGCGTCTTCCTTATTGAC	Fungi	Basidiomycota	Agaricomycetes	Boletales	Suillaceae	Suillus	/suillus-rhizopogon	KT964686|k__Fungi;p__Basidiomycota;c__Agaricomycetes;o__Boletales;f__Suillaceae;g__Suillus;s__Suillus_grevillei|SH1555179.08FU	100	3e-121	100	1659	7.61079	8
OTU_42	K100_810|F|ITS2	LR824685	ACACCTCAACTCTCATGGCTTTGCCATGACGAGCTTGGACTTTGGGGGTCTTGCTGGCCTGCGGTCGGCTCCTCTCAAATGAATTAGCTTGCCAGTGTTTGGTGGCATCACGGGTGTGATAACTATCTACGCTTGTGGTTTTCCACCAGGTAACCTTCAGTGATGAAGGTTCGCTGGGGCTCATAAATGTCTCTCCTCAGCGAGGACAGCTCTTTGAAC	Fungi	Basidiomycota	Agaricomycetes	Thelephorales	Thelephoraceae	Tomentella	/tomentella-thelephora	DQ150115|k__Fungi;p__Basidiomycota;c__Agaricomycetes;o__Thelephorales;f__Thelephoraceae;g__Tomentella;s__Tomentella_sp|SH1502311.08FU	100	3e-105	98.18	1	0.00458758	1
OTU_43	K100_835|F|ITS2	LR824686	ACACCCTCAACCTTCTTGGTTTATCGACCGGGAAGGATTGGACTTTGGAGGTTTTTGTTGCTGGCCTCGTTTGAAGCCAGCTCCTCCTAAATGAATTAGTGGGGTCCGCCGTGCCGATCCTCGACGTGATAAGTACGCTTCTACGTCTTGGGGTTTCGCACCGTTCTCGCTTCCAACTTCGAGTTGTGACTCGACCTTATAAA	Fungi	Basidiomycota	Agaricomycetes	Russulales	Russulaceae	Russula	/russula-lactarius	MN177630|k__Fungi;p__Basidiomycota;c__Agaricomycetes;o__Russulales;f__Russulaceae;g__Russula;s__Russula_sp|SH1567119.08FU	100	5e-103	100	5	0.0229379	2
OTU_44	K100_8434|F|ITS2	LR824687	ACACCTCAACTCACATGGTTTGCCATGATGAGCTTGGACTTTGGGGGTCTTGCTGGCCTGCGGTCAGCTCCTCTCAAATGGATCAGCTTGCCAGTGTTCGGTGGCATCATGGGTGTGATAACTATCTACGCCTGTGGTTTTCTACTGGATAACCTTCAGTGATGGAGGTTCGCTGGAGCTCATAAATGTCTCTCCTCAGTGAAGACAGCTTTTTGAAC	Fungi	Basidiomycota	Agaricomycetes	Thelephorales	Thelephoraceae	Tomentella	/tomentella-thelephora	MF352800|k__Fungi;p__Basidiomycota;c__Agaricomycetes;o__Thelephorales;f__Thelephoraceae;g__Tomentella;s__Tomentella_sp|SH1502197.08FU	100	6e-98	96.33	2	0.00917515	1
OTU_45	K100_8446|F|ITS2	LR824688	ACACCTCAACTCTCATGGCTTGCCGTGATGAGCTTGGACTTTGGGGGTCTTGTTGGCCTGTGAGCCAGCTCCTCTTAAATGAATTAGCTTGCCGGTGTTTGGTGGCATCACAGGTGTGATAACTATCTACGCTTGTGGTTTCCCATCAGATAACCTTCAGTGATGGAGGTTCACCGGGGCTTATAAACGTCTCTCCTCGGTGAGGACAGATTTTGACC	Fungi	Basidiomycota	Agaricomycetes	Thelephorales	Thelephoraceae	Tomentella	/tomentella-thelephora	UDB026398|k__Fungi;p__Basidiomycota;c__Agaricomycetes;o__Thelephorales;f__Thelephoraceae;g__Tomentella;s__Tomentella_sp|SH1528404.08FU	100	3e-111	100	1	0.00458758	1
OTU_46	K100_9059|F|ITS2	LR824689	AATCATCAACCTCATCGTGGGGCTTGGACTTTGGAGCGTGCTGGCCCCTGAGGTCGGCTCCTCTTTAAATGCATCAGCGGAAAGCCATTGATGTTTCCCGTCAGCGTGATAATCCTGTTGCGCTGCTAGGTCACGTCGGGGATCCGCTTATAATGGTCTTCGGACGATATCTA	Fungi	Basidiomycota	Agaricomycetes	Atheliales	Atheliaceae	Amphinema	/amphinema-tylospora	LC013706|k__Fungi;p__Basidiomycota;c__Agaricomycetes;o__Atheliales;f__Atheliaceae;g__Amphinema;s__Amphinema_sp|SH1648331.08FU	100	2e-86	100	2	0.00917515	2
OTU_47	K100_9992|F|ITS2	LR824690	AATACCACTCAAGCTCTTCTGCTTGGTCATGGAAGAAGAGTATGCTTGCATCCTCTCTTCTGAAATCGAATGGCGGACTGCCTCATGTGCCTCGCGTAGTAAGTTCATCTTTTCGCTTGGAGTGTGAGATAGTCTCGCCATCAACCCCCATACTTCTAA	Fungi	Ascomycota	Pezizomycetes	Pezizales	Pyronemataceae	Wilcoxina	/wilcoxina	KY322526|k__Fungi;p__Ascomycota;c__Pezizomycetes;o__Pezizales;f__Pyronemataceae;g__Wilcoxina;s__Wilcoxina_rehmii|SH1557656.08FU	100	1e-78	100	7	0.032113	5
OTU_48	K111_100792|F|ITS2	LR824691	ATATATATATCAACCTTCTCTTGTTGGAGTGGTTTGGATGTGGGGGTTTGCTGGCCTCTTAAAAGGTTCAGCTCCCTTGAAATGCATTAGCAGAACGGACCTGTTCATTGGTGTGATAACTATCTACGCTATTGAATGTGAGGGGATGTTCAGCTTTCTAACTGTCCTTGGACAATTTATCATTTT	Fungi	Basidiomycota	Agaricomycetes	Agaricales	Cortinariaceae	Cortinarius	/cortinarius	UDB038286|k__Fungi;p__Basidiomycota;c__Agaricomycetes;o__Agaricales;f__Cortinariaceae;g__Cortinarius;s__Cortinarius_impennoides|SH1545227.08FU	100	1e-93	100	18	0.0825764	1
OTU_49	K111_100798|F|ITS2	LR824692	AATTCTCAACCCCTCTCGATTAGCTTCGAGGGGGAGTTTGGATGGTGGGGGCTGCCGGAGACTAGGATTCGTCCTGGACTCGGGCTCTCCTGAAATGCATAGGCTTGCGGTCGACTTTCGACTTTGCGCGACAAGGCTTTCGGTGTGATAATGATCACCGTTTGCTGAAGCGCATGAATGAAGGTTCCGTGCCTCTAATACGTCGACTTATTATCTCTCCGAAGAGAAACGTCTTCCTAATTGAC	Fungi	Basidiomycota	Agaricomycetes	Boletales	Rhizopogonaceae	Rhizopogon	/suillus-rhizopogon	LC434319|k__Fungi;p__Basidiomycota;c__Agaricomycetes;o__Boletales;f__Rhizopogonaceae;g__Rhizopogon;s__Rhizopogon_laricinus|SH2710573.08FU	100	6e-123	99.18	1000	4.58758	2
OTU_50	K111_100801|F|ITS2	LR824693	ATATAATCAACCTTCAACTTGTTTGAGTGGTTTGGATGTGGGGGTTTGCTGGCCTTTCAAAAGGTTTCAGCTCCTCTGAAATGCATTAGCAGAACAAACCTTGTTCATTGGTGTGATAACTATCTACGCTTATGAATGTGAGGGGCAGTTCAGCTTTCTAATCGTCTTTGGACAATTCATCATTA	Fungi	Basidiomycota	Agaricomycetes	Agaricales	Cortinariaceae	Cortinarius	/cortinarius	KU711841|k__Fungi;p__Basidiomycota;c__Agaricomycetes;o__Agaricales;f__Cortinariaceae;g__Cortinarius;s__Cortinarius_sp|SH1545229.08FU	100	5e-93	100	301	1.38086	3
OTU_51	K111_101013|F|ITS2	LR824694	ATATATCAACCTTCTCTTTTTGAGTGGTTTGGATGTGGGGGTTTGCTGGCCTCTTAAAAAGGTCTTGGCTCTCCTGAAATACATTAGCAGAACAACCCTGTTCATTGGTGTGATAACTATCTACGCTATTGAATGTGAAGGGCAGTTTGGCTTTCTAACAGTCCTTGGACAAGCTCATCATTA	Fungi	Basidiomycota	Agaricomycetes	Agaricales	Cortinariaceae	Cortinarius	/cortinarius	UDB0746165|k__Fungi;p__Basidiomycota;c__Agaricomycetes;o__Agaricales;f__Cortinariaceae;g__Cortinarius;s__Cortinarius_diasemospermus|SH1545221.08FU	100	6e-92	100	4	0.0183503	1
OTU_52	K111_101041|F|ITS2	LR824695	AAACCCTCTCAGCCTTTGCTCCTTTACTGTGAGCGGGGTTGGACTTGGACGTCTGCGGGCCGACAAGGCCCGCTCGTCTTTAAATGCATTAGCTGGTCCCTATGGTCAGGTCCAAGCGACGGTGTGATAACATAACGTTTAGTGCGCCGTTCGTCGCTGGCCGGGGGGTCGCTTACAGCCGTCTTTGGACAAGCCTTTCATGTC	Fungi	Basidiomycota	Agaricomycetes	Gomphales	Gautieriaceae	Gautieria	/ramaria-gautieria	AF377058|k__Fungi;p__Basidiomycota;c__Agaricomycetes;o__Gomphales;f__Gautieriaceae;g__Gautieria;s__Gautieria_magnicellaris|SH1148719.08FU	100	7e-82	93.33	5	0.0229379	1
OTU_53	K111_101124|F|ITS2	LR824696	ATATATATATCAAACTTTCTCTTTGTTGAGCGGTTTGGATGTGGGGGTTTGCTGGCCTCTTAAAAAGGTTCAGCTCCTCTGAAATGCATTAGCAGAACAAACCTGTTCATTGGTGTGATAACTATCTACGCTATTGAATGTAAGGGGCAGTTCAGCTCTCTAATGGTCCTCGGACAATTCATCATTA	Fungi	Basidiomycota	Agaricomycetes	Agaricales	Cortinariaceae	Cortinarius	/cortinarius	MG136824|k__Fungi;p__Basidiomycota;c__Agaricomycetes;o__Agaricales;f__Cortinariaceae;g__Cortinarius;s__Cortinarius_subpaleaceus|SH1545256.08FU	100	4e-94	100	222	1.01844	3
OTU_54	K111_101406|F|ITS2	LR824697	AAAACCACATCACTCCAACTGTGGTGTTGGCGGCAGTGGTGCCAGCACCGAGGATTCTATCCCCGTCGGCCCACTCCACCAAAATGCATCGGGCGGACATACTGATCTCACCAAACTGACTTTGTAAAATCAATCAGCCAGGAGTGACGTTGTGTCCTGCCAAACCCTTGGGCCCCCATCCCAAGCGGTACAAGTAATG	Fungi	Ascomycota	Pezizomycetes	Pezizales	Tuberaceae	Choiromyces	/tuber-helvella	KP019343|k__Fungi;p__Ascomycota;c__Pezizomycetes;o__Pezizales;f__Tuberaceae;g__Choiromyces;s__Choiromyces_sp|SH1573632.08FU	99	1e-99	100	2	0.00917515	2
OTU_55	K111_101746|F|ITS2	LR824698	ACACCTCAACTCTTTATGGTTTTCCATGAAGGGCTTGGACTTTGGGGGTCTTGCTGGCCTTTAGTCAGCTCCTCTCAAACGAATCAGCTTTCCAGTGTTTGGCAGCGTCACAGGTGTGATAACTATCTACGCTTGTGGTTTTCTGCCAGGTAATCCTCAGTGATGGGGATTCGCTGGGGCTTATAAATGTCTCTCCTCAGCGAAGACAGCTTTGTGAAC	Fungi	Basidiomycota	Agaricomycetes	Thelephorales	Thelephoraceae	Tomentella	/tomentella-thelephora	MH794980|k__Fungi;p__Basidiomycota;c__Agaricomycetes;o__Thelephorales;f__Thelephoraceae;g__Tomentella;s__Tomentella_sp|SH1502220.08FU	100	3e-105	98.17	14	0.0642261	3
OTU_56	K112_102347|F|ITS2	LR824699	TACTCTCACACTCTCTGATCTTTTTGGATTCAGGGAGCGGTGGACTTGGGTGTTTGCTGCTTTCGTTGTAGCTCACCTCAAATGCATCAGTGCATCTCTTGGTTGGACATAGTACGGCGTGATAAGTATCTTCGCCGGCACCTCGCAAGAGGGTGGCCGATTGGGAGCTCTGTGCTTTCAAACCGTCTTCGGACAAATTTTGACA	Fungi	Basidiomycota	Agaricomycetes	Sebacinales	Sebacinaceae	Sebacina	/sebacina	MF352776|k__Fungi;p__Basidiomycota;c__Agaricomycetes;o__Sebacinales;f__Sebacinaceae;g__Sebacina;s__Sebacina_sp|SH1561855.08FU	100	4e-104	100	138	0.633086	2
OTU_57	K112_102351|F|ITS2	LR824700	ACACCTCAACTCTTCATGGTTTTCCATGATGAGCTTGGACTTTGGGGGACTTGCTGGCCTACAGTCAGCTCCTCTAAAATAAATCAGCTTGCCAGTGTTTGGTGGGTATCGCAGGTGTGATAACTATCTACGCTTGTGGTTTTCCACCAAGTAACCTTCAGCGATGGAGGTTCGCTGGAGCTCACAGATGTCTCTCCTCAGTGAGGACAGCCCTTTGAAT	Fungi	Basidiomycota	Agaricomycetes	Thelephorales	Thelephoraceae	Tomentella	/tomentella-thelephora	GQ469532|k__Fungi;p__Basidiomycota;c__Agaricomycetes;o__Thelephorales;f__Thelephoraceae;g__Tomentella;s__Tomentella_sp|SH1502769.08FU	99	7e-107	98.63	90	0.412882	2
OTU_58	K112_102372|F|ITS2	LR824701	TACTCTCACACTCTCTGATCTTTTTGGATTCAGGGAGCGGTGGACTTGGGTGTTTGCTGCTTACCTGCAGCTCACCTCAAATGCGTCAGTGCACCTCTTGGTTGGACATAGTACGGCGTGATAAGTATCTTCGCCGGCACCTCGCAAGAGGGTGGCCGATTGGGAGCTCTGTGCTTTCAAACCGTCTTCGGACAATTTCTGACA	Fungi	Basidiomycota	Agaricomycetes	Sebacinales	Sebacinaceae	Sebacina	/sebacina	JX630561|k__Fungi;p__Basidiomycota;c__Agaricomycetes;o__Sebacinales;f__Sebacinaceae;g__Sebacina;s__Sebacina_sp|SH1561855.08FU	100	1e-103	100	9	0.0412882	1
OTU_59	K112_102389|F|ITS2	LR824702	AATACCTCTCAAGCAGATTTGCTTGGTCTTGGAAGATGAGTTTGCTTGCATTCTCCCTTCTGAAATTCAAAGGCGGATGATCTCATATCCCCAGGCGTAGTAAGATTATCTTTTCGCATGGTGTGTGTGATAGTCCAGCCGTCGACCCCCAATTTTTTCAA	Fungi	Ascomycota	Pezizomycetes	Pezizales	Pyronemataceae	Trichophaea	/wilcoxina	GU181879|k__Fungi;p__Ascomycota;c__Pezizomycetes;o__Pezizales;f__Pyronemataceae;g__Trichophaea;s__Trichophaea_sp|SH1557659.08FU	100	9e-80	100	698	3.20213	11
OTU_60	K112_102429|F|ITS2	LR824703	ACACCTCAACTCTCATGGTTTGCCATGATGAGCTTGGACTTTGGGGGTCTTGCTGGCCTGCGGTCAGCTCCTCTCAAATGAATCAGCTTGCCAGTGTTTGGTGGCATCACAGGTGTGATAACTATCTACGCTTGTGGTTTTCTACCAGGTAACCTTCAGCGATGGAGGTTCGCTGGAGCTCATAAATGTCTCTCCCCAGTGAAGACAGCTTCGTGAAT	Fungi	Basidiomycota	Agaricomycetes	Thelephorales	Thelephoraceae	Tomentella	/tomentella-thelephora	JX630448|k__Fungi;p__Basidiomycota;c__Agaricomycetes;o__Thelephorales;f__Thelephoraceae;g__Tomentella;s__Tomentella_sp|SH1502211.08FU	100	3e-111	100	68	0.311955	1
OTU_61	K112_102517|F|ITS2	LR824704	AATACCACTCAAGCTCTTCTGCTTGGTCATGGAAGAAGAGTATGCTTGCATCCTCTCTTCTGAAATCGAATGGCGGACCGCCTCATGTGCCTCGCGTAGTAAGTTCATCTTTTCGCTGGCAGCGTGAGACAGTCTCGCCATCAACCCCCATACTTCTAA	Fungi	Ascomycota	Pezizomycetes	Pezizales	Pyronemataceae	Wilcoxina	/wilcoxina	UDB031655|k__Fungi;p__Ascomycota;c__Pezizomycetes;o__Pezizales;f__Pyronemataceae;g__Wilcoxina;s__Wilcoxina_sp|SH1557656.08FU	100	5e-77	99.37	19	0.087164	1
OTU_62	K112_102747|F|ITS2	LR824705	ATATATATATCAAACTTCTCTTGTTGAGTGGTTTGGATGTGGGGGTTTGCTGGCCTCTGTAAAAGGGGTTCAGCTCCTCTGAAATGCATTAGCAGAACAACCTGTTCATTGGTGTGATAACTATCTACGCTATTGAATGAGAGGGGCAGTTCAGCTCTCTAACAGTCCTTGGACAATTCATCATTA	Fungi	Basidiomycota	Agaricomycetes	Agaricales	Cortinariaceae	Cortinarius	/cortinarius	UDB024962|k__Fungi;p__Basidiomycota;c__Agaricomycetes;o__Agaricales;f__Cortinariaceae;g__Cortinarius;s__Cortinarius_sp|SH1545270.08FU	100	1e-93	100	3	0.0137627	1
OTU_63	K112_103014|F|ITS2	LR824706	ATATAAACTCAACCCTTCTCTTGTTGAAGGGTTTGGATGTGGGGGTTTTGCTGGCCTTCTCAAAGAGGTTCAGCTCCCCTGAAATGCATTAGCAGAACGACCTTGCTCATTGGTGTGATAACTATCTACGCTTATGACTGTGAGGGGCAGTTCAGCTTTCTAACAGTCCATGGACAATTCATCATTA	Fungi	Basidiomycota	Agaricomycetes	Agaricales	Cortinariaceae	Cortinarius	/cortinarius	UDB024952|k__Fungi;p__Basidiomycota;c__Agaricomycetes;o__Agaricales;f__Cortinariaceae;g__Cortinarius;s__Cortinarius_sp|SH1545284.08FU	100	4e-94	100	6	0.0275255	1
OTU_64	K112_107073|F|ITS2	LR824707	AATTCTCAACTGCCTTTTAGCATTTATTGTTAAAGGTGAAGTTGGATTTGGAGGATAATTGCTGGCGCAACTTATGTTGGTTGCTTGTTAGCTCCTCTTAAATGGATGAGCTTTTCTGATGAATCATGGCTCAGAGTAGTATCAATGTGATAATTATCTACATTAGATGTGAAAGCTGTGAGTAGAGAGTAACTTTTTGCTCCTACAGAAAAGGAAATGTTTTGGGGATAATAAACCCATATACAATGACAA	Fungi	Basidiomycota	Agaricomycetes	Thelephorales	Thelephoraceae	Pseudotomentella	/pseudotomentella	JQ393105|k__Fungi;p__Basidiomycota;c__Agaricomycetes;o__Thelephorales;f__Thelephoraceae;g__Pseudotomentella;s__Pseudotomentella_sp|SH1564316.08FU	100	4e-130	100	2	0.00917515	1
OTU_65	K112_107917|F|ITS2	LR824708	AATTATCAACTGTGCCAATTTGGTTACAGATTGGATGTGGGAGATTTTTTGCAGGCTTTTGATTTCTCTTTGAGAAAAACAAGGTCTGCTCTCCTGAAATGTATTAGCAGTGCCTTTGTTGGTTCATTAGGTGTGATAATTTATCTACATCTTCATATGGTACCTTCATTTGTAAAGGTCGTACTGCTTTCAATTGTCTTTGGACAAAGAAAACATATAATGTATGACAA	Fungi	Basidiomycota	Agaricomycetes	Agaricales	Inocybaceae	Inocybe	/inocybe	KJ810598|k__Fungi;p__Basidiomycota;c__Agaricomycetes;o__Agaricales;f__Inocybaceae;g__Inocybe;s__Inocybe_leucoblema|SH1527238.08FU	100	6e-113	98.7	1	0.00458758	1
OTU_66	K14_744627|F|ITS2	LR824709	AATTCTCAACCACACTGACTTTTGATCGGTGTGGCTTGGATTTGGGATTGTGGGCTATTGTCGTAGTCTGCTCCCCTGAAATTGATTAGCAGTGCCTTGGTGGAACTGTCTACAGGTGTGATAATTATCTACATCCTAGACATCTGCTTGATGCTGCTTTCTAAACCTTACCTCTATTGACAA	Fungi	Basidiomycota	Agaricomycetes	Agaricales	Inocybaceae	Inocybe	/inocybe	FJ904147|k__Fungi;p__Basidiomycota;c__Agaricomycetes;o__Agaricales;f__Inocybaceae;g__Inocybe;s__Inocybe_rimosa|SH1649736.08FU	100	3e-90	99.45	1	0.00458758	1
OTU_67	K2_2112154|F|ITS2	LR824710	ACACCTCAACTCTTCATGGTTTTCCATGATGAGCTTGGACTTTGGGGGTCTTGCTGGCCTGCGGTCAGCTCCTCTCAAATGAATCAGCTTACCAGTGTTTGGTGGGCATCACAGGTGTGATAACTATCTGCGCTTGTGGTTTTCCACCAAGTAACCTTCAGCAGTGGAGGTTCACTGGAGCTCACAGACGTCTCTCCTCAGTGAGGACAGCCCTTTGAAT	Fungi	Basidiomycota	Agaricomycetes	Thelephorales	Thelephoraceae	Thelephora	/tomentella-thelephora	EF644115|k__Fungi;p__Basidiomycota;c__Agaricomycetes;o__Thelephorales;f__Thelephoraceae;g__Thelephora;s__Thelephora_atra|SH1502215.08FU	100	2e-112	100	215	0.986329	3
OTU_68	K2_2112158|F|ITS2	LR824711	AAATCAACTCAAGCACTTTTGCATGGTCATGGAGGAAGAGTCCGCCTTGTTGCGGTCTCCCCTCCCAAAATCAAGGGCGGAAAGTCACTGGCACTCGGCGTAGTAGTATCATTCGCGGGTCATCCAGTGTCCTTCCTGCCGTCAAACCCCCACAATTCTCTT	Fungi	Ascomycota	Pezizomycetes	Pezizales	Pyronemataceae	Geopora	/geopora	AY634111|k__Fungi;p__Ascomycota;c__Pezizomycetes;o__Pezizales;f__Pyronemataceae;g__Geopora;s__Geopora_sp|SH1637517.08FU	100	1e-78	99.38	3	0.0137627	1
OTU_69	K2_2112195|F|ITS2	LR824712	AAATCAACTCAAGCGCTTTTGCATGGTCATGGAGGAAGAGTCCGTCTTGTTGCGGTCTCCCCGCCGAAAATCAACGGCGGAAAGTCACTGGTACCCGGCGTAGTAGAATCTGTTCGCTGTTCGGCCAGTGTCGTTCCTGCCGGCAAACCCCCCACAATTCTCTT	Fungi	Ascomycota	Pezizomycetes	Pezizales	Pyronemataceae	Geopora	/geopora	LC013719|k__Fungi;p__Ascomycota;c__Pezizomycetes;o__Pezizales;f__Pyronemataceae;g__Geopora;s__Geopora_sp|SH1637463.08FU	100	9e-80	99.39	59	0.270667	3
OTU_70	K3_2183266|F|ITS2	LR824713	TAACCCCTCAAGCTCAGCTTGGTGTTGGGGCCTGCCGTCTGGCAGCCCTTAAAATCAGTGGCGGTGCCATCTGGCTCTAAGCGTAGTAATTTTTCTCGCTACAGAGTTCTGGTGGATGCTTGCCATCAACCCCCAATTTTCTAT	Fungi	Ascomycota	Leotiomycetes	Helotiales	_	_	/Helotiales1	AJ292198|k__Fungi;p__Ascomycota;c__Leotiomycetes;o__Helotiales;f__unidentified;g__unidentified;s__Helotiales_sp|SH1564443.08FU	100	2e-70	100	7	0.032113	1
OTU_71	K3_2183271|F|ITS2	LR824714	AATTCTCAACCCCTCTCGATTTGTTTCGAGAGGGAGCTTGGATAGTGGGGGCTGCCGGAGACTAGGACTTTCGTCCTCGACTCGGGCTCTCCTTAAATGCATCGGCTTGCGGTCGACTTTCGACTTTGCGCGACAAGGCTTTCGGCGTGATAATGATCGCCGTTCGCTGAAGCGCATGAATGAAGGTTCCGTGCCTCTAATCCGTCGACTTTACTATCTCTTCGGAGAGAAAACGTCTTCCTCATTGAC	Fungi	Basidiomycota	Agaricomycetes	Boletales	Rhizopogonaceae	Rhizopogon	/suillus-rhizopogon	LC013778|k__Fungi;p__Basidiomycota;c__Agaricomycetes;o__Boletales;f__Rhizopogonaceae;g__Rhizopogon;s__Rhizopogon_sp|SH1555197.08FU	100	8e-127	99.6	19	0.087164	1
OTU_72	K3_2183331|F|ITS2	LR824715	AATTCTCAACCTTTTCAGCTTTTTCTGTTGATCAGGCTTGGATGTGGGAGTATGCGGGCTTCTCATCTCAGAGGTCGGCTCTCCTGAAATGCATTAGCGGGACCTTTGTTGCCTGGCTTTGGTGTGATAAATTATTTACGCCATCGTGAAGAGCAGCTTTATAAACGGGGTTCAGCTTCTAAATGGTCTCCTTTAAGACCAACTTCTGACA	Fungi	Basidiomycota	Agaricomycetes	Agaricales	Tricholomataceae	Tricholoma	/tricholoma	UDB036390|k__Fungi;p__Basidiomycota;c__Agaricomycetes;o__Agaricales;f__Tricholomataceae;g__Tricholoma;s__Tricholoma_terreum|SH1647743.08FU	100	2e-107	100	139	0.637673	3
OTU_73	K3_2183359|F|ITS2	LR824716	ACACCTCAACCCTCGTGGTTTGCCACGATCGGCTTGGACTTTGGAGGTTTTGCTGGCCCCCCTGTGTGGTCGGCTCCTCTCAAATGAATCAGCTTACCAGTGTTTGGTGGCGTCGCAGGTGTGATAACTATCTACGCTCGCGGCCGTCTGCCATCCAACCTTCAGCGATGAGGGTTCGCTGGGGCTCACAGATGTCTCTCCCGAGCGAAGACAGCCTTTGATC	Fungi	Basidiomycota	Agaricomycetes	Thelephorales	Thelephoraceae	Tomentella	/tomentella-thelephora	UDB022947|k__Fungi;p__Basidiomycota;c__Agaricomycetes;o__Thelephorales;f__Thelephoraceae;g__Tomentella;s__Tomentella_sp|SH1502636.08FU	98	1e-94	95.43	2	0.00917515	1
OTU_74	K3_2183659|F|ITS2	LR824717	AATTCTCAACCCCTCTCGATTAGCTTCGAGGGGGAGCTTGGATAGTGGGGGCTGCCAGAGACCTGGACCTTTGCGTCTGGGACTTGGGCTCTCCTGAAATGCATCGGCTTGCGATCGACTTTCGACTTTGCGCGACGAGGCTTTCGGCGTGATAATGATCGCCGTCTTCTGAAGCGCATGACAGAAGGTCTCGTGCCTCCAACACGTCGACATCGCCTTCGATGTCTTCCTTCTTTAT	Fungi	Basidiomycota	Agaricomycetes	Boletales	Gomphidiaceae	Chroogomphus	/suillus-rhizopogon	MG457849|k__Fungi;p__Basidiomycota;c__Agaricomycetes;o__Boletales;f__Gomphidiaceae;g__Chroogomphus;s__Chroogomphus_rutilus|SH1630054.08FU	100	1e-120	99.58	5	0.0229379	1
OTU_75	K3_2183701|F|ITS2	LR824718	ACAACCACTTCACATCTAATGTGGTATTGACTGATGTGGACTGCACTTGCGGTGCTCACCCCACTCAGCTGAAATGTATAGGCCAGAGAAGCCAACCATGGCAGCAGACTCACAGAGTGTTATACAATGCTAAACCAGTCTGTAGCAGGTTGGAATCTGTGTCAGTGGACCCCCCGTTCATAAAAACTATAGA	Fungi	Ascomycota	Pezizomycetes	Pezizales	Tuberaceae	_	/tuber-helvella	KX444406|k__Fungi;p__Ascomycota;c__Pezizomycetes;o__Pezizales;f__Tuberaceae;g__Tuber;s__Tuber_sp|SH1648994.08FU	94	2e-57	88.95	6	0.0275255	1
OTU_76	K3_2183725|F|ITS2	LR824719	GTACTCTCACACTCCCACTCTTTTGGAGCGGGAGCGGTGGACTTGGGTGTTGCTGCTTTGCGGTGGCTCACCTCAAATGGAGTAGTGCAACTCTCGGTTGGACATAGTACGGCGTGATAAGTGTCTTCGCCGGCGCCTCACTTGAGGGTGGCCGATCGGGAGCTCTGTGCTTCCAACCGTCTTCGGACAATCTCTGACA	Fungi	Basidiomycota	Agaricomycetes	Sebacinales	Sebacinaceae	Sebacina	/sebacina	KX444320|k__Fungi;p__Basidiomycota;c__Agaricomycetes;o__Sebacinales;f__Sebacinaceae;g__Sebacina;s__Sebacina_sp|SH1562109.08FU	96	5e-88	97.4	8	0.0367006	2
OTU_77	K3_2183790|F|ITS2	LR824720	ACAACCAGTTCAATCCCTCTTAGAGAATATTTGGGGGATTGGTTATTGGTGAATGAGGGGATGCGTGCATCACGTTGAATCACCTCACCACCGAAATTCAGAGGCGGTTTGTCCCCACGTGTTTGTGGCGTTGTAAAGGCTTACCAGCACTATTCGCTCGCATCGTGGGTGCACTGCTTGCCATTGGAGAAATCCCCATTCATCAAA	Fungi	Ascomycota	Pezizomycetes	Pezizales	Pyronemataceae	Humaria	/genea-humaria	KT692924|k__Fungi;p__Ascomycota;c__Pezizomycetes;o__Pezizales;f__Pyronemataceae;g__Humaria;s__Humaria_hemisphaerica|SH1608583.08FU	100	7e-102	99.03	1	0.00458758	1
OTU_78	K3_2184354|F|ITS2	LR824721	AATTCTCAACCCCTCTCGATTTGCTTCGAGAGGGCGCTTGGATGGTGGAGGCTGCCGGAGACCTGGATTCGTTCAGGACTCGGGCTCCTCTGAAATGAATCGGCTTGCGGTCGACCCTTCGACTTTGCATGACAAGGCCTTTGGCGTGATAATGATCGCCGTTCGCCGAAGTGCACGACAGAAAACGGTCCCGCGCCCCTAATGCGTCGACGCCTTCCGGGCGTCTTCCTCATTGAC	Fungi	Basidiomycota	Agaricomycetes	Boletales	Suillaceae	Suillus	/suillus-rhizopogon	UDB0778689|k__Fungi;p__Basidiomycota;c__Agaricomycetes;o__Boletales;f__Suillaceae;g__Suillus;s__Suillus_sp|SH1555178.08FU	100	4e-120	99.58	8	0.0367006	2
OTU_79	K3_2185198|F|ITS2	LR824722	AATTCTCAACCTTTTCAGCTTTCTTTGTTGATCAGGCTTGGATGTGGGAGTATGCGGGCTTCTCAGAAGTCGGCTCTCCTGAAATGCATTAGCGGGACCTTTGTTGCCTGGCTTTGGTGTGATAATTATCTACGCCATTGTAGTCAAGCAGCTTAAAATGAGGTTTCAGCTTCTAACCGTCTCCCCTGAGACAACTTTTCGACA	Fungi	Basidiomycota	Agaricomycetes	Agaricales	Tricholomataceae	Tricholoma	/tricholoma	MG367247|k__Fungi;p__Basidiomycota;c__Agaricomycetes;o__Agaricales;f__Tricholomataceae;g__Tricholoma;s__Tricholoma_argyraceum|SH1647742.08FU	100	7e-102	99.51	2	0.00917515	2
OTU_80	K3_2185661|F|ITS2	LR824723	AATTCTCAACTATTATCAGCTTTTGCTGATGATGGCTTGGATATGGGGGTTTATTTTGCTGGCTTCACAGAATGTCAGCTCCCCTTAAATGCATTAGCTGGTGCCCCGCGTGGACTGTCTATTGGTGTGATAATTATCTACGCCGTGGACATCTACAATCATATGGGTTTGCACTGCTTCCAACCGTCTGTTTACTCAGACAATACATGACA	Fungi	Basidiomycota	Agaricomycetes	Agaricales	Hymenogastraceae	Hebeloma	/hebeloma-alnicola	UDB036458|k__Fungi;p__Basidiomycota;c__Agaricomycetes;o__Agaricales;f__Hymenogastraceae;g__Hebeloma;s__Hebeloma_mesophaeum|SH1563787.08FU	100	5e-108	100	2	0.00917515	1
OTU_81	K3_2196336|F|ITS2	LR824724	AATTCTCAACCCCTCTCGATTTGCTTCGAGCGGGTGCTTGGATGTTGGGGGCTGCCGGAGACACTGGATTTCGTCCAGGACTCGGGCTCCTCTTAAATGAATCGGCTCGCGGTCGACTTTCGACTTTGCATGACAAGGCCTTTGGCGTGATAATGATCGCCGTTCGCCGAAGTGCAAGACAGAATGGTCCCGTGCCTCTAATGCGTCGACGCCTCTAGGGGCGTCTTCCTCATTGAC	Fungi	Basidiomycota	Agaricomycetes	Boletales	Suillaceae	Suillus	/suillus-rhizopogon	LC013805|k__Fungi;p__Basidiomycota;c__Agaricomycetes;o__Boletales;f__Suillaceae;g__Suillus;s__Suillus_sp|SH1555172.08FU	100	8e-122	100	16	0.0734012	5
OTU_82	K35_2149543|F|ITS2	LR824725	ACACCTCAACTCTCGTGGTCTTCCGCGATGAGCTTGGACTTTGGAGGTTTGCTGGCCCTGCGGCCGGCTCCTCTCAAATGAATCAGCTTGCCAGTGTTTGGTGGCGTCACGGGTGTGATAACTATCTACGCTCGCGGTCGCCCGCCAGGTTACCCTCAGCGATGAAGGTTCATTGGGGCTCACAAACGTCTCTCCTCAGCGAAGACAACTTTTGAAC	Fungi	Basidiomycota	Agaricomycetes	Thelephorales	Thelephoraceae	Tomentella	/tomentella-thelephora	MH794994|k__Fungi;p__Basidiomycota;c__Agaricomycetes;o__Thelephorales;f__Thelephoraceae;g__Tomentella;s__Tomentella_sp|SH1502249.08FU	100	9e-111	100	14	0.0642261	1
OTU_83	K35_2149743|F|ITS2	LR824726	ACACCTCAACTCTCGTGGTCTTCCACGACGAGCTTGGACTTTGGAGGTTTGCTGGCCCTGCGGCCGGCTTCTCTCAAATGAATCAGCTTGCCAGTGTTTGGTGGCATCACGGGTGTGATAACTATCTACGCTCGCGGTCGTCTGCCAGGTTACCTTCAGCGATGAAGGTTCATTGGGGCTCACAAACGTCTCTCCTCAGCGAAGACAACTTTTGAAC	Fungi	Basidiomycota	Agaricomycetes	Thelephorales	Thelephoraceae	Tomentella	/tomentella-thelephora	MH795000|k__Fungi;p__Basidiomycota;c__Agaricomycetes;o__Thelephorales;f__Thelephoraceae;g__Tomentella;s__Tomentella_sp|SH1502256.08FU	100	2e-102	97.7	6	0.0275255	2
OTU_84	K38_2169654|F|ITS2	LR824727	ACACCTCAACTCTCATGGTTTGCCATGATGAGCTTGGACTTTGGGGGTCTTGCTGGCCTATGGTCAGCTCCTCTCAAATGGATCAGCTTGCCAGTGTTTGGTGGCGTCATGGGTGTGATAACTATCTACGCTCGTGGTTCCCTGCCAGGTAACCTTCGGAAACGGAGGTTCACTGGGGCTCACAAATGTCTCTCCTCGGTGAGGACAGCTTTTTGAAC	Fungi	Basidiomycota	Agaricomycetes	Thelephorales	Thelephoraceae	Tomentella	/tomentella-thelephora	KX095164|k__Fungi;p__Basidiomycota;c__Agaricomycetes;o__Thelephorales;f__Thelephoraceae;g__Tomentella;s__Tomentella_sp|SH1141131.08FU	97	3e-86	93.87	1	0.00458758	1
OTU_85	K38_2170224|F|ITS2	LR824728	AATACCTCTCAAGCAAATTTGCTTGGTCGTGGAAGATGAGTATGCTTGCATTCTCCCTTCTGAAATTCAAAGGCGGATGATCTCATATCCCCAGGTGTAGTAAGTTTATCTTTTCGCTTGGTGTGTGTGATTGCCCTGCCGTTGACCTCCATTTTTTCAA	Fungi	Ascomycota	Pezizomycetes	Pezizales	Pyronemataceae	Trichophaea	/wilcoxina	KP125537|k__Fungi;p__Ascomycota;c__Pezizomycetes;o__Pezizales;f__Pyronemataceae;g__Trichophaea;s__Trichophaea_sp|SH1557658.08FU	100	1e-77	99.38	13	0.0596385	4
OTU_86	K4_2264146|F|ITS2	LR824729	AATTCTCAACCCCTCTCGATTAGCTTCGATAGGGTGCTTGGATACTGGGGGCTGCCGGAGACCTGGACGAAAGTCTGGGACTCGGGCTCTCCTGAAATGAATCGGCTTGCGGTCGACTTTCGACTTTGCATGACAAGGCTTTTGGCGTGATAATGATCGCCGTTCGCTGAAGTGCATGAATGAATGGCGCCGTGCCTCTAATGCGTCGACGCCTTTTTTGGCGTCTTCCTTATTGAC	Fungi	Basidiomycota	Agaricomycetes	Boletales	Suillaceae	Suillus	/suillus-rhizopogon	KU721432|k__Fungi;p__Basidiomycota;c__Agaricomycetes;o__Boletales;f__Suillaceae;g__Suillus;s__Suillus_acidus|SH1630048.08FU	100	6e-113	97.89	103	0.47252	1
OTU_87	K51_2282773|F|ITS2	LR824730	AATTCTCAACCCCGAATGGATTTGTTTCTGTTCGGGGCTTGGACTTGGAGCGTGCTGGCGAAAGTCGGCTCCTCTCAAATGCATCAGCGGAATTCAACCTTTGGCTTTCGGACATCAGTGTGATAATGACGTTGCGCTGTCGTCTGACCCTCAAAGTCCGCTTACAATGGTCTTCGGACAAGCATTTCATCAT	Fungi	Basidiomycota	Agaricomycetes	Atheliales	Atheliaceae	Piloderma	/piloderma	KM374356|k__Fungi;p__Basidiomycota;c__Agaricomycetes;o__Atheliales;f__Atheliaceae;g__Piloderma;s__Piloderma_sp|SH1544843.08FU	100	2e-82	95.36	105	0.481696	2
OTU_88	K51_2290591|F|ITS2	LR824731	AAACTCTCAAACCACATCATTCGTTTGACGTGGCTTTGGACGTGGGGGTTGCCGGCTTTCTCCTCAGAGAGCCCTGCTCCCCTGAAATGCATTAGTGGTATCTGGAGTGGAAAACCGCTAGGTGTGATAATACTGTCTATGCCTTTGGTTATGCCACAATGTGCTGCTTCCAACCACATTTTATTTTGACAA	Fungi	Basidiomycota	Agaricomycetes	Agaricales	Inocybaceae	Inocybe	/inocybe	KX510016|k__Fungi;p__Basidiomycota;c__Agaricomycetes;o__Agaricales;f__Inocybaceae;g__Inocybe;s__Inocybe_sp|SH1174119.08FU	95	6e-92	100	1	0.00458758	1
OTU_89	K54_2302119|F|ITS2	LR824732	ACACCTCAACTCTCATGGTTTGCCATGATGAGCTTGGACTTTGGGGGTCTTGCTGGCCTGTGGTCGGCTCCTCTCAAATGAATCAGCTTTCCAGTGTTTGGTGGCATCACAGGTGTGATAAATATCTACACTTGCGGTTTCCTGCCAAGTAACCTTTCAGCAATGGAGGTTCGCTGGGGCTCATAAACGTCTCTCCTCAGTGGGGACAGCTTTGTGAAT	Fungi	Basidiomycota	Agaricomycetes	Thelephorales	Thelephoraceae	Tomentella	/tomentella-thelephora	JX030279|k__Fungi;p__Basidiomycota;c__Agaricomycetes;o__Thelephorales;f__Thelephoraceae;g__Tomentella;s__Tomentella_sp|SH1502341.08FU	100	2e-103	97.72	1	0.00458758	1
OTU_90	K59_2362194|F|ITS2	LR824733	ACAACCCCATCACAAAAAGTGTGGTATTGGCAGAAGTGGGTAGGGCTAGCAGTGCTGGCCCCACTCTGCTGGAATGAATAGGCCGGAAATGTAGACCATTGTCACAGACTTTCAGAGTATTTTGAAATGCTAAATTAGTTTGTAGGCCTGGTTGGAATCTAGGCCATTCGACCCCTATTCTGTGTAAAGCAGTAA	Fungi	Ascomycota	Pezizomycetes	Pezizales	Tuberaceae	Tuber	/tuber-helvella	UDB008955|k__Fungi;p__Ascomycota;c__Pezizomycetes;o__Pezizales;f__Tuberaceae;g__Tuber;s__Tuber_sp|SH1648388.08FU	100	1e-98	100	20	0.0917515	2
OTU_91	K59_2362369|F|ITS2	LR824734	ACACCTCAACTCTCACGGTTCGCCGTGACGAGCTTGGACTTTGGAGGCTTTGCTGGCCTGTGGGTCGGCTCCTCTCAAATGAATCAGCTTACCGGTGTATTGGTGGCGTCACAGGTGTGATAACTATCTACGCTTGCGGTCGCCCGCCAGACAACCTCTGCCATCGTCGGAGGTTTGCCGGAGGCTCACAAACGTCTCCCGAGCGGAGACAGCCTTCTGAAC	Fungi	Basidiomycota	Agaricomycetes	Thelephorales	Thelephoraceae	Tomentella	/tomentella-thelephora	AB769926|k__Fungi;p__Basidiomycota;c__Agaricomycetes;o__Thelephorales;f__Thelephoraceae;g__Tomentella;s__Tomentella_sp|SH1642921.08FU	100	2e-113	100	4	0.0183503	1
OTU_92	K59_2363841|F|ITS2	LR824735	AAATCTCAACCTCCTTTGTTCCTTCCGAGGATCAAAGGAGGCTTGGACTTTGGAGGTCTTTGCTGGCGTCTTTAAAGGCCAGCTCCTCTCAAATGAATTAGCGGGGTCCTCTTTGCCGATCCTTGACATGTGATAAGATGCTTCCGTGTCTTGGTTTTCTGGCTCTGTTGCCTTTGGGACCCGCTTCTAATCGTCTTGACCTTGCGTCGAGACAATGTTCGAGCTCGTCTCCCTTCTCGGGAAACCCCCTCGACCCCACGAAC	Fungi	Basidiomycota	Agaricomycetes	Russulales	Russulaceae	Lactarius	/russula-lactarius	MK351975|k__Fungi;p__Basidiomycota;c__Agaricomycetes;o__Russulales;f__Russulaceae;g__Lactarius;s__Lactarius_castanopsidis|SH2595310.08FU	100	3e-131	98.86	1	0.00458758	1
OTU_93	K59_2369754|F|ITS2	LR824736	AACCATCAACCTCCTCGTGAGGCTTGGACTTTGGAGCGTGCTGGCCTTCGAGGTCGGCTCCTCTTTAAATGCATCAGCGGAAGTCCATTGACGTCTCCCGTCCGGCGTGATAATCCTGTTGCGCCGTCAGGGTCTCGTTGGGGCTCGCTTATAATGGTCTTCGGACGACATCCT	Fungi	Basidiomycota	Agaricomycetes	Atheliales	Atheliaceae	Amphinema	/amphinema-tylospora	LC013708|k__Fungi;p__Basidiomycota;c__Agaricomycetes;o__Atheliales;f__Atheliaceae;g__Amphinema;s__Amphinema_sp|SH1550161.08FU	100	6e-87	100	1	0.00458758	1
OTU_94	K59_2370418|F|ITS2	LR824737	AATTATCAACTGTGCCACTTTGGTTACAGATTGGATGTGGGAGATTTCTTGCAGGCTTTCGACTTCTCTTTGAATGCCAGCTCTCCTGAAATGTATTAGCAGTGCCTTTGTTGGTTCATTAGGTGTGATAATTTATCTACATCTTCACATGGTGCCTTCATTTGTAAAAGGTCATATTGCTTCTAATTGTCTTTGGACAAAAAACATGTTAATGTGTGACAA	Fungi	Basidiomycota	Agaricomycetes	Agaricales	Inocybaceae	Inocybe	/inocybe	UDB0754134|k__Fungi;p__Basidiomycota;c__Agaricomycetes;o__Agaricales;f__Inocybaceae;g__Inocybe;s__Inocybe_sp|SH1527239.08FU	100	7e-112	99.55	1	0.00458758	1
OTU_95	K60_2403209|F|ITS2	LR824738	AATTCTCAACCTTTATTAGCTTTTGTTGATAATGGCTTGGATATGGGGGTTTATTTTGCCGGCTTCTTCACAGATGGTCAGCTCCCCTTAAATGCATTAGCCGGTGCCCCGTGTGGACTGTCTATTGGTGTGATAATTATCTACGCCGTGGACATCTGCAATCATATGGGTTTGCGCTGCTTCCAACCGTCTGTTCATTCAGACAATACATGACC	Fungi	Basidiomycota	Agaricomycetes	Agaricales	Hymenogastraceae	Hebeloma	/hebeloma-alnicola	JQ751184|k__Fungi;p__Basidiomycota;c__Agaricomycetes;o__Agaricales;f__Hymenogastraceae;g__Hebeloma;s__Hebeloma_parvicystidiatum|SH1563838.08FU	100	1e-109	100	1	0.00458758	1
OTU_96	K90_2889406|F|ITS2	LR824739	AACCCTCAAAAATCCTCTTCTTTGAGGATTTTTGGACTTGGAGGTTCAATGCTCGCTTTTGCATTCGAAAGCGAGCTCCTCTCAAAAGAATCAGTGGGGTCTGCTTTGCTTGTCCTTGACGTGATAAGATGTTTCTACGTTTTGGATTTGACATGGTCCCTGCTCCTAATCGTCTCACGGACAATGATGGTGCTTCGGTCGCCGCCGCCTACCTTGGCGGGGGAGGCTGAGCCCACAAAAA	Fungi	Basidiomycota	Agaricomycetes	Russulales	Russulaceae	Russula	/russula-lactarius	MK811395|k__Fungi;p__Basidiomycota;c__Agaricomycetes;o__Russulales;f__Russulaceae;g__Russula;s__Russula_sp|SH1649425.08FU	100	2e-122	99.59	1	0.00458758	1
OTU_97	K91_2901584|F|ITS2	LR824740	AAAACCGTCTCACAGATAATGTGGTATTGGTAGAAGTGGGTAGTACTTAACAGTGCTTTTTCCTACTCTCCTGAAATGAATAGGCCAGAAAAGTGGACCATGGTAACAGACTTTCAGAGTGTTTTAAAATGCTAAACTAGTCTTGCCCAGGTTGGAATCTGAGCCACTGGACCCCCATTTAGTCCAAAACAGAGA	Fungi	Ascomycota	Pezizomycetes	Pezizales	Tuberaceae	Tuber	/tuber-helvella	KP276179|k__Fungi;p__Ascomycota;c__Pezizomycetes;o__Pezizales;f__Tuberaceae;g__Tuber;s__Tuber_xuanhuaense|SH1561454.08FU	100	1e-98	100	1	0.00458758	1
OTU_98	K96_2957426|F|ITS2	LR824741	ACACCTCAACTCTCATGGTTTTGCCGTGATGAGCTTGGACTTTGGGGGTCTTGCTGGCCTGCGGTCGGCTCCTCTCAAATGAATCAGCTTGCCAGTGTTTGGTGGCATCACGGGTGTGATAACTATCTACGCTTGTGGTTTTCCACCAGGTAACCTTCAGTGATGGAGGTTCGCTGGAGCTCATAAACGTCTCTCCTTAGCGAGGACAGTTTCCTGAAT	Fungi	Basidiomycota	Agaricomycetes	Thelephorales	Thelephoraceae	Tomentella	/tomentella-thelephora	JQ711917|k__Fungi;p__Basidiomycota;c__Agaricomycetes;o__Thelephorales;f__Thelephoraceae;g__Tomentella;s__Tomentella_bryophila|SH1502792.08FU	100	7e-112	100	527	2.41765	1
OTU_99	K96_2957447|F|ITS2	LR824742	CACCACTCAAGCCTGGCTTGGTGTTGGGCGACGTCCCCTTTGGGGACGCGCCTCGAAACGCTCGGCGGCGTGGCACCGGCTTTAAGCGTAGCAGAATCTTTCGCTTCAAAAGTCAGGGCCCCGTCTGCCGGAAGACCTACTCGCAA	Fungi	Ascomycota	Dothideomycetes	Mytilinidales	Gloniaceae	Cenococcum	/cenococcum	KC967391|k__Fungi;p__Ascomycota;c__Dothideomycetes;o__Mytilinidales;f__Gloniaceae;g__Cenococcum;s__Cenococcum_geophilum|SH1639590.08FU	100	2e-71	100	52	0.238554	6
OTU_100	K96_2957570|F|ITS2	LR824743	GTACTCTCACACTCTCTGATCCTTTGGATTTGGGGAGCGGTGGACTTGGGTGCTTGCTGCTTCCTTGTGGCTCACCTGAAATGTGTCAGTGCATCTCTTGATTGGACATAGTACGGCGTGATAAGTGTCTTCGCCGGCACCTCGTAAGAGGGTGGCTGATCGGGAGCCCTGTGCTTTCAAACTGTCTTCGGACAATCCCTGACA	Fungi	Basidiomycota	Agaricomycetes	Sebacinales	Sebacinaceae	Sebacina	/sebacina	KX444257|k__Fungi;p__Basidiomycota;c__Agaricomycetes;o__Sebacinales;f__Sebacinaceae;g__Sebacina;s__Sebacina_sp|SH1561864.08FU	100	7e-97	98.04	2	0.00917515	1
OTU_101	K96_2957611|F|ITS2	LR824744	ACACCCTCAACCTTCTTGGTTTATCGACCGGGAAGGCTTGGACTTTGGAGGTTTTTGTTGCTGGCCTCGTTTGAAGCCAGCTCCTCCTAAACGAATTAGTGGGGTCCGCCGTGCCGACCCTCGACGTGATAAGTACGCTTCTACGTCTTGGGGTTTCGCACTGTCGCCTGCTTCCAACCGTCTTCGAATGAAGACAATCTTATAGA	Fungi	Basidiomycota	Agaricomycetes	Russulales	Russulaceae	Russula	/russula-lactarius	UDB027765|k__Fungi;p__Basidiomycota;c__Agaricomycetes;o__Russulales;f__Russulaceae;g__Russula;s__Russula_aeruginea|SH1567121.08FU	100	1e-104	100	6	0.0275255	1
OTU_102	K96_2957642|F|ITS2	LR824745	CACCACTCAAGCCTGGCTTGGTGTTGGGCGACGTCCCCTTTGGGGACGCGCCTCGAAACGCTCGGCGGCGTGGCACCGGCTTTAAGCGTAGCAGAATCTTTCGCTTTGAAGGTCGGGGCCCCGTCTGCCGGAAGACCTACTCACAA	Fungi	Ascomycota	Dothideomycetes	Mytilinidales	Gloniaceae	Cenococcum	/cenococcum	FJ803950|k__Fungi;p__Ascomycota;c__Dothideomycetes;o__Mytilinidales;f__Gloniaceae;g__Cenococcum;s__Cenococcum_sp|SH1639590.08FU	100	8e-70	99.32	7	0.032113	3
OTU_103	K96_2958192|F|ITS2	LR824746	ATATTATATATCAACCCTCCTTTGTTGAGTGGTTTGGATGTGAGGGTTTGCTGGATTCCTTAAAAGGATTCAGCTCCCTTGAAATGCATTAGCAGAATAACCTGTTCATTGGTGTGATAACTATCTACACTATTGAATTCAAGGGCCAGTTCAGCTTTCTAACAGTCCTTGGACAATTTATCATTT	Fungi	Basidiomycota	Agaricomycetes	Agaricales	Cortinariaceae	Cortinarius	/cortinarius	KJ705154|k__Fungi;p__Basidiomycota;c__Agaricomycetes;o__Agaricales;f__Cortinariaceae;g__Cortinarius;s__Cortinarius_venustus|SH1545354.08FU	100	1e-93	100	1	0.00458758	1
OTU_104	K96_2958291|F|ITS2	LR824747	AAATCAACTCAAGCACTTTTGCGTGGTCATGGAGGAAGAGCCTGCCTTGTTGCGGTGTCTCCCCTCCCAAAATCAACGGCGGAAAGTCACTGGCACTCGGCGTAGTAGTATCATTCGCCGATCATCCAGTGTCCTTCCTGCCGCCAAACCCCCACAATTCTCTC	Fungi	Ascomycota	Pezizomycetes	Pezizales	Pyronemataceae	Geopora	/geopora	LC013727|k__Fungi;p__Ascomycota;c__Pezizomycetes;o__Pezizales;f__Pyronemataceae;g__Geopora;s__Geopora_sp|SH1637483.08FU	100	2e-81	100	132	0.60556	3
OTU_105	K96_2959392|F|ITS2	LR824748	ACACCTCAACTCTCATGGTCTTCCATGATGAGCTTGGACTTTGGGGGTTTGCTGGCCCTGCGGCCGGCTCCTCTCAAATGAATCAGCTTGCCAGTGTTTGGTGGCATCACGGGTGTGATAACTATCTACGCTCGCGGTCGTCTGCCAGGTAACCCTCAGCGATGAGGGTTCATTGGAGCTCATAAACGTCTCTCCTCGGCGAGGACAACTTTTGAAC	Fungi	Basidiomycota	Agaricomycetes	Thelephorales	Thelephoraceae	Tomentella	/tomentella-thelephora	LC145311|k__Fungi;p__Basidiomycota;c__Agaricomycetes;o__Thelephorales;f__Thelephoraceae;g__Tomentella;s__Tomentella_sp|SH1502193.08FU	100	9e-111	100	2	0.00917515	2
OTU_106	K96_2965763|F|ITS2	LR824749	ACACCTCAACTCTCATGGTTTTGCCGTGATGAGCTTGGACTTTGGGGGTCTTGCTGGCCTGCGGTCGGCTCCTCTCAAATGAATCAGCTTGCCAGTGTTTGGTGGCATCACGGGTGTGATAACTATCTACGCTTGTGGTTTTCCACCAGGTAACCTTCAGTGATGGGGGTTCGCTGGGGCTCATAAACGTCCCTCGAGGACAGCCTTTGAAC	Fungi	Basidiomycota	Agaricomycetes	Thelephorales	Thelephoraceae	Tomentella	/tomentella-thelephora	JQ711917|k__Fungi;p__Basidiomycota;c__Agaricomycetes;o__Thelephorales;f__Thelephoraceae;g__Tomentella;s__Tomentella_bryophila|SH1502792.08FU	92	2e-93	98.46	6	0.0275255	1
OTU_107	K96_2967736|F|ITS2	LR824750	ACACCACTCAAGCTCAGCTTGGTATTGGGTCACGCCAGCAATGGTGAACCTCAAACTCAGTGGCGGCACCGTTGGGTCCCGAGCGTAGTAAATATCTCGCTGAGGGTTCCCTCCGGTTGGCGACCAACAACCCAATTTTCTAA	Fungi	Ascomycota	Pezizomycetes	Pezizales	Helvellaceae	Helvella	/tuber-helvella	KY322650|k__Fungi;p__Ascomycota;c__Pezizomycetes;o__Pezizales;f__Helvellaceae;g__Helvella;s__Helvella_crispa|SH1566868.08FU	100	8e-70	100	2	0.00917515	1
OTU_108	K96_2969035|F|ITS2	LR824751	AATTCTCAACCCCTCTCGATTTGCTTCGAGCGGGTGCTTGGATGTTGGGGGCTGCCGGAGACTTGGATTCGTCCAGGACTCGGGCTCTCCTTAAATGAATCGGCTTGCGGTCGACTTTCGACTTTGCGCGACAAGGCTTTCGGCGTGATAATGATCGCCGTTCGCTGAAGCGCATGAATGAAGGTCTCGCGCCTCTAACACGTCGACCCGCCCAACGGCCCGTCTTCTTTCTTGAC	Fungi	Basidiomycota	Agaricomycetes	Boletales	Suillaceae	Suillus	/suillus-rhizopogon	KX213736|k__Fungi;p__Basidiomycota;c__Agaricomycetes;o__Boletales;f__Suillaceae;g__Suillus;s__Suillus_ampliporus|SH1630055.08FU	100	3e-121	100	279	1.27993	1
OTU_109	K97_2969665|F|ITS2	LR824752	AATTCTCAACCCCTCTCGATTTTCTTCGAGCGGGTGCTTGGATCTTGGGGGCTGCCGGAGACTTGGATTCGTCCAGGACTCGGGCTCTCCTTAAATGAATCGGCTTGCGGTCGACTTTCGACTTTGCGCGACAAGGCTTTCGGAGTGATAATGATCTCCGTTCGCTGAAGCGCATGAATGAAGGTCCCGCGCCTCTAATACGTCGACGCGCCTTCCGGCCCGTCTTCTTTCTTGAC	Fungi	Basidiomycota	Agaricomycetes	Boletales	Suillaceae	Suillus	/suillus-rhizopogon	KT964678|k__Fungi;p__Basidiomycota;c__Agaricomycetes;o__Boletales;f__Suillaceae;g__Suillus;s__Suillus_cavipes|SH1630055.08FU	100	3e-121	100	36	0.165153	1
OTU_110	K97_2969727|F|ITS2	LR824753	ATATATCAACCCTCTTCACGTTTTGCATGTCGAGTGTTGGATGTGGGAGTTTTTTGCTGGACTCTCTTGAGAGGTCAGCTCTCCTAAAATACATTAGCAAAACAATTTGTTTACTGCTCATTGGTGTGATAACTATCTACGCTATTGACGGTAAAGCACGGTTTAGCTTCTAACAGTCCATTGGCTTGGACAATCTTTTATCA	Fungi	Basidiomycota	Agaricomycetes	Agaricales	Cortinariaceae	Cortinarius	/cortinarius	FJ769529|k__Fungi;p__Basidiomycota;c__Agaricomycetes;o__Agaricales;f__Cortinariaceae;g__Cortinarius;s__Cortinarius_sp|SH1503821.08FU	100	2e-101	99.51	9	0.0412882	1
OTU_111	K97_2969848|F|ITS2	LR824754	ACACCTCAACTCTCATGGCTTGCCATGATGAGCTTGGACTTTGGGGGTCTTGCTGGCCTGCGGTCGGCTCCTCTCAAATGAATCAGCTTGCCAGTGTTTGGTGGCATCACAGGTGTGATAACTATCTACGCTTGTGGTTTTCCACCAGGTAACCTTCAGTGATGGAGGTTCGCTGGAGCTCATAAACGTCTCTCCTCGGTGAGGACAGCTCTTTGAAC	Fungi	Basidiomycota	Agaricomycetes	Thelephorales	Thelephoraceae	Tomentella	/tomentella-thelephora	U83482|k__Fungi;p__Basidiomycota;c__Agaricomycetes;o__Thelephorales;f__Thelephoraceae;g__Tomentella;s__Tomentella_sp|SH1502353.08FU	100	3e-111	100	15	0.0688137	3
OTU_112	K97_2970108|F|ITS2	LR824755	ACACCTCAACTCTCATGGTTTGCCATGATGAGCTTGGACTTTGGGGGTTTTGCTGGCCTGCGGTCAGCTCCTCTCAAACGGATCAGCTTACCAGTATTTGGTGGCGTCACGGGTGTGATAATTATCTACACTTGTGGTTGTCTGCTGAGTAACCTTTGGCGACAGGGGTTTGCTGGAGCTTATAAATGTCTCTCCCCAGCGAAGACAGCTTTTTGACC	Fungi	Basidiomycota	Agaricomycetes	Thelephorales	Thelephoraceae	Tomentella	/tomentella-thelephora	AB848645|k__Fungi;p__Basidiomycota;c__Agaricomycetes;o__Thelephorales;f__Thelephoraceae;g__Tomentella;s__Tomentella_sp|SH1502255.08FU	100	1e-109	99.54	11	0.0504633	1
OTU_113	K97_2970141|F|ITS2	LR824756	ATATATCAACCTCCTCAGGTTTTTACTTGTCGAGTGTTTGGATGTGGGGGTTTCTTTTGCTGGTCTCTTTCGAGATCGGCTCCCCTGAAATGCATTAGCGGAACAATTTGTTGACCCGTTCATTGGTGTGATAACTATCTACGCTATTGACGTGAAGCAGGTTCAGCTTCTAACAGTCCATTAACTTGGACAAATTTTCATTA	Fungi	Basidiomycota	Agaricomycetes	Agaricales	Cortinariaceae	Cortinarius	/cortinarius	UDB026440|k__Fungi;p__Basidiomycota;c__Agaricomycetes;o__Agaricales;f__Cortinariaceae;g__Cortinarius;s__Cortinarius_sp|SH1503717.08FU	100	5e-103	100	7	0.032113	1
OTU_114	K97_2970427|F|ITS2	LR824757	AATTCTCAACCTTTATCACTTTTTGCTGATAATGGCTTGGATATGGGGGTCTATTTTGCTGGCTTCTTTACGGATGGTCAGCTCCCCTTAAATGCATTAGCCGGTGCCCCGCGTGGACTGTCTATTGGTGTGATAATTATCTACGCCGTGGACATCTGCAATTATATGGGTTTGCACTGCTTCCAACCGTCTGTTCAATCAGACAATACATGACA	Fungi	Basidiomycota	Agaricomycetes	Agaricales	Hymenogastraceae	Hebeloma	/hebeloma-alnicola	MH795029|k__Fungi;p__Basidiomycota;c__Agaricomycetes;o__Agaricales;f__Hymenogastraceae;g__Hebeloma;s__Hebeloma_sp|SH1563975.08FU	100	1e-109	100	2	0.00917515	1
OTU_115	K97_2971680|F|ITS2	LR824758	AATTATCAATCACTTTTTTCTTTGAGAAGAGGGATTTGGATTTGGAGTGTTGCTGGCCATCAAAGTCAGCTCCTCTTAAATGCATTAGCGTGTACACTTTGTGGAATAGGCTTTGGTTTGATAAAATATCTATGCCATCGCCATGAAGCAAAAAGTCAGCTACAAATAAAAATGAAACATTTTGTAC	Fungi	Basidiomycota	Agaricomycetes	Agaricales	Hygrophoraceae	Hygrophorus	/hygrophorus	HM044495|k__Fungi;p__Basidiomycota;c__Agaricomycetes;o__Agaricales;f__Hygrophoraceae;g__Hygrophorus;s__Hygrophorus_sp|SH1508833.08FU	100	4e-94	100	2	0.00917515	1
OTU_116	K98_2979624|F|ITS2	LR824759	ATATAATCAACCCTTATCTTTTTTGAGAGGGGTTTGGATGTGGGGGTTTGCTGGCCTTTCAAAAGGCTCAGCTCCCCTGAAATGCATTAGCAGAACAACCTTGCTCATTGGTGTGATAACTATCTACGCTTATGAATGTGAGGGGCAGTTCAGCTTTCCAACTGTCTTTGGACAAATCATCATTA	Fungi	Basidiomycota	Agaricomycetes	Agaricales	Cortinariaceae	Cortinarius	/cortinarius	KJ769270|k__Fungi;p__Basidiomycota;c__Agaricomycetes;o__Agaricales;f__Cortinariaceae;g__Cortinarius;s__Cortinarius_sp|SH1545379.08FU	100	5e-93	100	85	0.389944	1
OTU_117	K98_2979670|F|ITS2	LR824760	ACACCTCAACTCTCATGGTTCGCCATGATGAGCTTGGACTCTGGGGGTTTTGCTGGCCCGCGGTCGGCTCCCCTCAAATGAATCAGCCTCCCAGTGTTTGGTGGCATCACGGGTGTGATAAATATCTACGCTCGCGGTTGTCTGCCAGGTAACCTTTGGTTACAAAGGTTTGCTGGAGCTCACAGATGTCTCTCCTCGGTGAGGACAGCTTTTTTGAAC	Fungi	Basidiomycota	Agaricomycetes	Thelephorales	Thelephoraceae	Tomentella	/tomentella-thelephora	UDB026995|k__Fungi;p__Basidiomycota;c__Agaricomycetes;o__Thelephorales;f__Thelephoraceae;g__Tomentella;s__Tomentella_sp|SH1502188.08FU	100	2e-108	99.09	3	0.0137627	1
OTU_118	K98_2979684|F|ITS2	LR824761	ATATATCAACCTCTTCAGCTTTTTGCAAGTTGAGTGTTGGATGTGGGGGTATTTTTTGCTGGACTCTATACAATCTGAGGTCAGCTCCCCTAAAATGCATTAGCGAAACTATTTGTTTACTGCTCATTGGTGTGATAACTATCTACGCTATTGACGGTGAAGCATGTTTAGCTTCTAACAGTCCATTAACTTGGACAATCTCTTATTA	Fungi	Basidiomycota	Agaricomycetes	Agaricales	Cortinariaceae	Cortinarius	/cortinarius	HQ445595|k__Fungi;p__Basidiomycota;c__Agaricomycetes;o__Agaricales;f__Cortinariaceae;g__Cortinarius;s__Cortinarius_sp|SH1503730.08FU	100	9e-106	100	128	0.58721	1
OTU_119	K98_2980424|F|ITS2	LR824762	AATACCTCTCAAGCATATTTGCTTGGTTGTGGAAGAAGAGTATGCCAGCATTCTCCCTTCTGAAATTGAAAGGCGGATCATAGCATATTCCGTGGCGTAGTAAGTTTATCTTGTCGCTCGGAGTGTGTGCAATTGTCCTGCCATCAAACCCCCTATTTTTCAA	Fungi	Ascomycota	Pezizomycetes	Pezizales	Pyronemataceae	Trichophaea	/wilcoxina	KX095155|k__Fungi;p__Ascomycota;c__Pezizomycetes;o__Pezizales;f__Pyronemataceae;g__Trichophaea;s__Trichophaea_sp|SH1557660.08FU	96	1e-77	100	491	2.2525	6
OTU_120	K99_2991777|F|ITS2	LR824763	AATTCTCAACTGCCCCAGGCTTTGTGGCCTGTGGGTGAAGTTGGACTTGGAGGTATGCTGGCGCATGAATGGGCTTTTGTGCTCCGTCTCGCTTGTTGGCTCCTCTTGAATGCATGAGCTTTCCAATCCTTGGCAAAGTATCGTCGATGTGATAATTGTCTACGTCGCCTGAGAAAGCCGAAAAGGGGAAATCTTTGATCACGCTGGGGTGACCTGCGTCTGACAA	Fungi	Basidiomycota	Agaricomycetes	Thelephorales	Thelephoraceae	Tomentellopsis	/tomentellopsis	KX545379|k__Fungi;p__Basidiomycota;c__Agaricomycetes;o__Thelephorales;f__Thelephoraceae;g__Tomentellopsis;s__Tomentellopsis_sp|SH1518331.08FU	100	4e-114	99.56	103	0.47252	1
OTU_121	K99_2992352|F|ITS2	LR824764	AATTCTCAACTGCCCCAGGCTTTGTGGCCTGCAGGTGAAGTTGGACTTGGAGGTATGCTGGCGCATGAATGGGCTTTTGTGCCCCGTCTTGCTTGTTGGCTCCTCTCGAATGCATGAGCTTTCCAATCCTTGGCAAAGTATCGTCGATGTGATAATTGTCTACGTCGCCTGAGAAAGCCGAAAAGGGGAAATCTTTGATCATGCTAGGGTGACCTGCGTCTGACAA	Fungi	Basidiomycota	Agaricomycetes	Thelephorales	Thelephoraceae	Tomentellopsis	/tomentellopsis	KU176264|k__Fungi;p__Basidiomycota;c__Agaricomycetes;o__Thelephorales;f__Thelephoraceae;g__Tomentellopsis;s__Tomentellopsis_sp|SH1518331.08FU	100	4e-109	98.23	62	0.28443	1
OTU_122	K99_2993098|F|ITS2	LR824765	ACACCTCAACTCTCACGGTTTGCCGTGATGAGCTTGGACTTTGGAGGTCTTGCCGGCCTGTGGTTGGCTCCTCTCAAATGAATCAGCTTGCCAGTGTTTGGTGGCATCCCAGGTGTGATAACTATCTACGCTTGTGGCTTTCCACCAGGTAACCTTCAGCGATGGAGGTTCGCTGGGGCTCACAAATGTCTCTCCTAAGTGAGGACGGCTTCTTGAAT	Fungi	Basidiomycota	Agaricomycetes	Thelephorales	Thelephoraceae	Tomentella	/tomentella-thelephora	JQ791171|k__Fungi;p__Basidiomycota;c__Agaricomycetes;o__Thelephorales;f__Thelephoraceae;g__Tomentella;s__Tomentella_sp|SH1502208.08FU	100	3e-111	100	9	0.0412882	1
