# Supplementary material for: Ectomycorrhizal fungal communities associated with Larix gemelinii Rupr. in the Great Khingan Mountains, China
Source: PeerJ. 2021 Apr 15;9:e11230. doi: 10.7717/peerj.11230 (PMC8053382; doi:10.7717/peerj.11230)
Supplement: Supplemental Information 15 [file peerj-09-11230-s015.xlsx]

## Sheet: Sheet1
Supplemental Table S6 65 unique OTUs in GH*.
OTUs_ID	GH(abundance)	HGL+SHWL(abundance)	Abundance	Relative abundance (%)	Frequency	Relative frequency (%)
K100_2233|F|ITS2	1195	0	1195	5.48215	6	28.5714
K111_100798|F|ITS2	1000	0	1000	4.58758	2	9.52381
K100_214|F|ITS2	597	0	597	2.73878	3	14.2857
K96_2957426|F|ITS2	527	0	527	2.41765	1	4.7619
K100_11008|F|ITS2	317	0	317	1.45426	1	4.7619
K111_100801|F|ITS2	301	0	301	1.38086	3	14.2857
K96_2969035|F|ITS2	279	0	279	1.27993	1	4.7619
K100_16242|F|ITS2	265	0	265	1.21571	1	4.7619
K100_1385|F|ITS2	170	0	170	0.779888	2	9.52381
K112_102347|F|ITS2	138	0	138	0.633086	2	9.52381
K98_2979684|F|ITS2	128	0	128	0.58721	1	4.7619
K99_2991777|F|ITS2	103	0	103	0.47252	1	4.7619
K98_2979624|F|ITS2	85	0	85	0.389944	1	4.7619
K100_49|F|ITS2	68	0	68	0.311955	3	14.2857
K112_102429|F|ITS2	68	0	68	0.311955	1	4.7619
K99_2992352|F|ITS2	62	0	62	0.28443	1	4.7619
K100_4167|F|ITS2	58	0	58	0.266079	3	14.2857
K97_2969665|F|ITS2	36	0	36	0.165153	1	4.7619
K100_14053|F|ITS2	25	0	25	0.114689	4	19.0476
K112_102517|F|ITS2	19	0	19	0.087164	1	4.7619
K111_100792|F|ITS2	18	0	18	0.0825764	1	4.7619
K97_2969848|F|ITS2	15	0	15	0.0688137	3	14.2857
K100_182|F|ITS2	11	0	11	0.0504633	3	14.2857
K97_2970108|F|ITS2	11	0	11	0.0504633	1	4.7619
K112_102372|F|ITS2	9	0	9	0.0412882	1	4.7619
K97_2969727|F|ITS2	9	0	9	0.0412882	1	4.7619
K99_2993098|F|ITS2	9	0	9	0.0412882	1	4.7619
K100_1278|F|ITS2	8	0	8	0.0367006	2	9.52381
K100_330|F|ITS2	7	0	7	0.032113	3	14.2857
K96_2957642|F|ITS2	7	0	7	0.032113	3	14.2857
K97_2970141|F|ITS2	7	0	7	0.032113	1	4.7619
K112_103014|F|ITS2	6	0	6	0.0275255	1	4.7619
K96_2957611|F|ITS2	6	0	6	0.0275255	1	4.7619
K96_2965763|F|ITS2	6	0	6	0.0275255	1	4.7619
K100_2066|F|ITS2	5	0	5	0.0229379	3	14.2857
K100_2441|F|ITS2	5	0	5	0.0229379	2	9.52381
K100_835|F|ITS2	5	0	5	0.0229379	2	9.52381
K111_101041|F|ITS2	5	0	5	0.0229379	1	4.7619
K100_11921|F|ITS2	4	0	4	0.0183503	1	4.7619
K111_101013|F|ITS2	4	0	4	0.0183503	1	4.7619
K100_11580|F|ITS2	3	0	3	0.0137627	2	9.52381
K100_1598|F|ITS2	3	0	3	0.0137627	2	9.52381
K100_2865|F|ITS2	3	0	3	0.0137627	2	9.52381
K112_102747|F|ITS2	3	0	3	0.0137627	1	4.7619
K98_2979670|F|ITS2	3	0	3	0.0137627	1	4.7619
K100_4415|F|ITS2	2	0	2	0.00917515	2	9.52381
K96_2959392|F|ITS2	2	0	2	0.00917515	2	9.52381
K100_13429|F|ITS2	2	0	2	0.00917515	1	4.7619
K100_8434|F|ITS2	2	0	2	0.00917515	1	4.7619
K112_107073|F|ITS2	2	0	2	0.00917515	1	4.7619
K96_2957570|F|ITS2	2	0	2	0.00917515	1	4.7619
K97_2970427|F|ITS2	2	0	2	0.00917515	1	4.7619
K97_2971680|F|ITS2	2	0	2	0.00917515	1	4.7619
K100_13560|F|ITS2	1	0	1	0.00458758	1	4.7619
K100_3421|F|ITS2	1	0	1	0.00458758	1	4.7619
K100_3830|F|ITS2	1	0	1	0.00458758	1	4.7619
K100_4029|F|ITS2	1	0	1	0.00458758	1	4.7619
K100_810|F|ITS2	1	0	1	0.00458758	1	4.7619
K100_8446|F|ITS2	1	0	1	0.00458758	1	4.7619
K112_107917|F|ITS2	1	0	1	0.00458758	1	4.7619
K14_744627|F|ITS2	1	0	1	0.00458758	1	4.7619
K60_2403209|F|ITS2	1	0	1	0.00458758	1	4.7619
K90_2889406|F|ITS2	1	0	1	0.00458758	1	4.7619
K91_2901584|F|ITS2	1	0	1	0.00458758	1	4.7619
K96_2958192|F|ITS2	1	0	1	0.00458758	1	4.7619
* Detailed information on fungal identification is avaliable in Table S2
